# Supplementary material
Source: publisher figshare collection journal article supplement (https://gsajournals.figshare.com/ndownloader/files/11484098)
Supplement: Supplementary file 1 [file 11484098]

## Sheet: Sheet1
Supplemental Dataset S2. Genes down-regulated in Acyrthosiphon pisum's bacteriocyte relative to the body. FDR corrected p-value < 0.05, normalized read count values > 1.5x
Gene Name	baseMean	log2FoldChange	Fold Change	p-value	p_adj
LOC100167115	994.015	-27.1486	1.48779e+08	1.56814e-19	9.6989e-19
LOC100167585	873.991	-26.9735	1.31774e+08	2.6689e-19	1.6244e-18
LOC100169351	1027.03	-26.8244	1.18834e+08	3.76518e-19	2.27421e-18
LOC100159315	697.588	-26.6043	1.02021e+08	8.10026e-19	4.79715e-18
LOC100161758	251.655	-24.052	1.73925e+07	1.16009e-15	5.64799e-15
LOC100569502	96.8776	-23.9091	1.57522e+07	1.71124e-15	8.21879e-15
LOC100160903	96.4394	-23.8919	1.55663e+07	1.79198e-15	8.59461e-15
LOC100160997	59.683	-23.2263	9.8135e+06	1.05054e-14	4.76288e-14
LOC100164675	53.492	-23.0747	8.83452e+06	1.56139e-14	6.99441e-14
LOC100573230	48.3792	-22.9336	8.01148e+06	1.35929e-15	6.58364e-15
LOC100573180	39.7439	-22.6564	6.61095e+06	4.60071e-14	1.99258e-13
LOC103309495	33.584	-22.4252	5.63178e+06	8.29636e-14	3.53019e-13
LOC100573495	33.0509	-22.3998	5.5338e+06	8.84633e-14	3.75723e-13
LOC103309852	32.2744	-22.3667	5.40826e+06	9.62012e-14	4.07665e-13
LOC100302403	29.7269	-22.2524	4.99624e+06	1.28399e-13	5.39012e-13
LOC100575335	21.4101	-21.7399	3.50238e+06	4.60371e-13	1.86069e-12
LOC100167523	15.96	-21.3881	2.74452e+06	1.09038e-12	4.2902e-12
LOC100160661	14.9864	-21.2737	2.5352e+06	1.43859e-12	5.6121e-12
LOC100163017	14563.4	-15.468	45323.4	1.68257e-80	9.7518e-79
LOC100167965	4394.95	-15.175	36993.2	5.14942e-18	2.92292e-17
LOC100167381	3948.09	-15.0203	33232.9	9.03871e-68	3.99348e-66
LOC100159263	2680.21	-14.4616	22561.1	1.01968e-63	4.08527e-62
LOC100161000	2505.65	-14.3644	21091.4	8.55651e-62	3.26334e-60
LOC100164777	2182.52	-14.1651	18370.6	1.66486e-13	6.92281e-13
LOC100167426	2161.77	-14.1514	18196.7	1.4938e-62	5.78266e-61
LOC100160756	2147.65	-14.1419	18077.7	5.49278e-61	2.04941e-59
LOC100575246	1803.94	-13.8903	15184.5	1.47662e-47	3.59282e-46
LOC100168111	1123.78	-13.2075	9459.44	1.65014e-53	4.9344e-52
LOC100158802	890.773	-12.8723	7498.08	1.73705e-50	4.70966e-49
LOC100159010	24328.9	-12.8697	7484.51	9.28841e-47	2.20032e-45
LOC100165865	789.303	-12.6978	6643.89	6.41756e-19	3.82146e-18
LOC100161535	749.204	-12.6226	6306.32	2.09107e-15	9.98034e-15
LOC100165052	748.15	-12.6205	6297.38	4.24942e-15	1.98502e-14
LOC100166244	2018.31	-12.6106	6254.33	1.51756e-48	3.84666e-47
LOC100166039	1766.34	-12.4226	5489.86	1.21089e-42	2.40697e-41
LOC100166379	603.242	-12.31	5078.01	1.8629e-47	4.50613e-46
LOC100161228	589.153	-12.2759	4959.23	1.36442e-45	3.09024e-44
LOC100302370	567.171	-12.221	4773.96	2.89782e-11	1.04147e-10
LOC100161933	564.591	-12.2145	4752.66	1.19518e-44	2.57952e-43
LOC100159324	551.793	-12.1815	4645.25	5.73189e-44	1.2068e-42
LOC100161052	546.464	-12.1674	4599.94	8.94069e-43	1.78753e-41
LOC100159731	489.254	-12.0078	4118.34	3.75963e-26	3.46151e-25
LOC100160390	476.09	-11.9685	4007.54	1.1513e-44	2.49263e-43
LOC100167379	59734.2	-11.9604	3985.04	6.86423e-16	3.38908e-15
LOC100166076	471.329	-11.9539	3967.31	2.02961e-12	7.84949e-12
LOC100570634	464.389	-11.9325	3908.91	2.47593e-14	1.09368e-13
LOC100165635	436.654	-11.844	3676.23	3.4299e-45	7.61778e-44
LOC100164384	427.587	-11.8136	3599.42	7.42112e-42	1.43103e-40
cp21	3147.37	-11.7969	3558.14	5.69921e-23	4.36009e-22
LOC100158972	1493.27	-11.7467	3436.45	8.97904e-40	1.57839e-38
LOC100166365	357.374	-11.5548	3008.38	1.49828e-25	1.32678e-24
cp25	680.961	-11.5225	2941.77	5.84772e-24	4.73904e-23
LOC100161930	335.508	-11.4636	2824.16	2.29153e-16	1.17381e-15
LOC100165694	1225.88	-11.4586	2814.29	4.68878e-36	6.91025e-35
LOC100160527	330.566	-11.4423	2782.83	7.83709e-41	1.43353e-39
LOC100571324	1442.04	-11.3857	2675.77	2.74255e-48	6.85903e-47
LOC100162450	1112.08	-11.3531	2615.99	2.22233e-51	6.18804e-50
LOC100162762	289.792	-11.2524	2439.55	2.51607e-36	3.7483e-35
LOC100159384	284.808	-11.2271	2397.2	3.61982e-05	7.76058e-05
LOC100164620	284.147	-11.224	2392.02	2.0731e-38	3.4056e-37
LOC100166282	279.132	-11.1982	2349.61	5.80526e-38	9.3505e-37
LOC100573697	274.288	-11.1729	2308.81	8.49349e-30	9.39154e-29
LOC100165440	262.092	-11.1072	2206.03	8.04844e-29	8.57766e-28
LOC100168362	260.733	-11.0999	2194.83	3.2052e-34	4.41769e-33
LOC100166529	255.764	-11.0722	2153.16	2.09355e-28	2.19382e-27
LOC103307655	248.458	-11.0302	2091.29	1.10539e-24	9.37812e-24
LOC100572071	231.043	-10.9255	1944.93	1.22125e-35	1.76829e-34
LOC103309419	228.5	-10.9096	1923.6	1.55398e-37	2.45319e-36
LOC100168329	623.824	-10.9077	1921.07	1.12599e-31	1.37797e-30
LOC100159916	220.299	-10.8567	1854.37	3.14091e-17	1.70051e-16
LOC100169417	213.133	-10.8089	1793.97	5.2839e-07	1.33984e-06
LOC100168829	205.57	-10.7569	1730.37	2.53048e-27	2.49815e-26
LOC100570454	202.885	-10.7378	1707.71	5.4372e-16	2.71045e-15
LOC100569703	784.813	-10.7376	1707.37	4.94218e-21	3.34006e-20
LOC100162309	196.808	-10.6942	1656.82	1.6664e-31	2.01896e-30
LOC100159821	860.286	-10.6775	1637.72	5.68791e-30	6.33003e-29
LOC100163695	377.532	-10.6715	1630.9	3.45594e-36	5.12627e-35
LOC100161604	189.638	-10.6405	1596.23	3.88529e-19	2.34539e-18
LOC100168571	263.188	-10.6317	1586.57	2.308e-19	1.41141e-18
LOC100571147	184.123	-10.5978	1549.72	1.14184e-29	1.25785e-28
LOC100572197	183.398	-10.5925	1544.03	5.65101e-33	7.3983e-32
LOC100572539	482.476	-10.5423	1491.28	7.91847e-33	1.02434e-31
ACYPI009260	1283.38	-10.4348	1384.16	1.38872e-18	8.11713e-18
LOC100569114	164.343	-10.434	1383.36	3.71234e-11	1.32314e-10
LOC103308784	163.402	-10.4258	1375.54	5.00865e-32	6.26324e-31
LOC100159443	162.192	-10.4147	1365.05	1.16698e-25	1.03965e-24
LOC100160475	161.324	-10.4072	1357.93	1.76771e-26	1.64962e-25
LOC100159066	568.334	-10.3911	1342.87	2.40518e-44	5.1426e-43
LOC100165115	529.85	-10.3682	1321.68	6.06246e-26	5.508e-25
LOC100160663	156.462	-10.363	1316.98	2.95464e-10	9.863e-10
LOC100163414	155.443	-10.3536	1308.39	2.41746e-11	8.73394e-11
LOC100166089	151.613	-10.3175	1276.04	4.74389e-25	4.10918e-24
LOC100160237	150.348	-10.3059	1265.84	1.65283e-31	2.00487e-30
LOC100572342	148.636	-10.2889	1251	5.25282e-30	5.85845e-29
LOC100161503	410.309	-10.2852	1247.86	2.05003e-21	1.42179e-20
LOC100571776	147.217	-10.2755	1239.45	3.47239e-30	3.91079e-29
LOC100168878	145.753	-10.2608	1226.94	2.16496e-15	1.03211e-14
LOC100167899	144.668	-10.25	1217.72	1.00846e-06	2.50031e-06
LOC100575630	138.517	-10.1873	1165.95	8.00858e-20	5.04553e-19
LOC100571592	137.839	-10.1802	1160.2	1.3173e-06	3.22687e-06
LOC100571683	129.732	-10.093	1092.17	1.06915e-29	1.17871e-28
LOC100163038	129.038	-10.0851	1086.2	9.49018e-15	4.31777e-14
LOC100573582	125.739	-10.0479	1058.53	1.53538e-21	1.07206e-20
LOC100165936	124.849	-10.0377	1051.1	9.0133e-27	8.55041e-26
LOC103309657	124.142	-10.0299	1045.48	3.95385e-32	4.95926e-31
LOC103308433	122.653	-10.0118	1032.4	1.63235e-13	6.79039e-13
LOC100163486	122.483	-10.0102	1031.26	6.05544e-29	6.49049e-28
LOC100169520	646.769	-9.96487	999.366	4.35975e-16	2.18815e-15
LOC100161501	118.575	-9.96269	997.858	1.31012e-29	1.43938e-28
LOC100165637	117.296	-9.94745	987.369	2.03787e-11	7.40141e-11
LOC100159656	116.803	-9.94136	983.21	1.98302e-20	1.29276e-19
LOC100574388	115.192	-9.92167	969.884	1.89076e-28	1.98433e-27
LOC100572351	114.169	-9.90889	961.329	2.04314e-27	2.03161e-26
LOC100161432	113.813	-9.90409	958.137	1.39302e-12	5.44049e-12
LOC100165880	112.961	-9.89307	950.849	2.22594e-06	5.34728e-06
LOC103307653	110.898	-9.86627	933.347	2.89297e-15	1.36623e-14
LOC100571412	110.545	-9.86197	930.567	3.25742e-27	3.19897e-26
LOC100167760	109.335	-9.8461	920.388	2.05872e-13	8.52277e-13
LOC100162787	944.236	-9.845	919.688	1.16143e-13	4.89055e-13
LOC100167220	108.648	-9.83722	914.739	7.91274e-24	6.36009e-23
LOC100163510	106.913	-9.81311	899.58	5.80879e-28	5.93918e-27
LOC100158725	106.014	-9.80131	892.251	5.56244e-15	2.57101e-14
LOC100169465	104.548	-9.78148	880.072	1.57297e-10	5.37069e-10
cp23	14897.3	-9.78045	879.445	7.77851e-44	1.62938e-42
LOC100161526	103.398	-9.76602	870.691	1.67404e-26	1.56433e-25
LOC100571853	103.353	-9.7649	870.018	7.51928e-28	7.64542e-27
LOC100167980	99.5545	-9.71076	837.971	1.95099e-05	4.30579e-05
LOC103310639	6854.47	-9.66498	811.797	1.77295e-23	1.39198e-22
LOC100168266	429.187	-9.65028	803.57	5.26726e-47	1.25641e-45
LOC100569282	94.9245	-9.64295	799.5	2.17879e-29	2.3748e-28
cp30	14788.7	-9.63668	796.033	4.58675e-65	1.89656e-63
LOC100164008	94.2107	-9.63228	793.606	1.36251e-28	1.43799e-27
LOC103311602	92.5245	-9.60514	778.819	1.91373e-18	1.11009e-17
LOC100166917	92.0246	-9.59736	774.629	2.35087e-18	1.35832e-17
LOC100571391	90.2914	-9.57007	760.114	6.90328e-28	7.04079e-27
cp7	6219.89	-9.55413	751.759	2.21209e-23	1.72952e-22
LOC103309051	88.6457	-9.54331	746.142	1.05622e-10	3.6504e-10
LOC100168315	86.6019	-9.50961	728.919	8.72931e-09	2.58299e-08
cp26	120.848	-9.50793	728.07	6.19774e-15	2.85569e-14
LOC100164495	86.4707	-9.50763	727.916	2.11989e-24	1.77012e-23
LOC100160121	31300	-9.50516	726.669	1.19098e-107	1.18142e-105
LOC100165741	13548.4	-9.50462	726.4	2.84434e-51	7.86693e-50
LOC100167369	10052.9	-9.49889	723.523	3.30927e-25	2.88467e-24
LOC100574012	85.7751	-9.49598	722.06	9.69613e-27	9.16867e-26
LOC100166314	3909.65	-9.46678	707.595	2.99083e-14	1.31298e-13
cp43	6624.48	-9.46087	704.7	1.29575e-57	4.41906e-56
LOC100569865	116.794	-9.45895	703.764	5.17294e-24	4.20707e-23
LOC100166119	17120.2	-9.45303	700.883	1.47733e-84	9.35025e-83
LOC100568947	80.9929	-9.41332	681.855	5.43724e-27	5.24973e-26
LOC100162416	80.836	-9.4102	680.38	5.21247e-10	1.70361e-09
LOC100163277	79.6398	-9.38912	670.513	8.58483e-26	7.71812e-25
LOC100570986	79.6324	-9.38867	670.305	5.82066e-06	1.34805e-05
LOC100571296	271.35	-9.38866	670.298	1.12601e-23	8.96678e-23
LOC100167305	777.089	-9.37604	664.46	1.82283e-27	1.81693e-26
cp45	9956.82	-9.3692	661.32	3.31066e-56	1.07573e-54
LOC100161368	212.569	-9.36767	660.615	7.12746e-28	7.25868e-27
LOC100168086	76.9139	-9.33844	647.368	1.3058e-05	2.92535e-05
LOC103311500	76.1443	-9.32402	640.929	6.59564e-09	1.97315e-08
cp44	10614.7	-9.32237	640.195	1.37305e-37	2.17423e-36
LOC100573148	275.681	-9.32181	639.947	2.49852e-28	2.60758e-27
LOC103309259	74.6116	-9.2951	628.207	2.08757e-20	1.35877e-19
LOC100164229	738.062	-9.27413	619.143	8.57335e-22	6.0872e-21
cp22	4702.16	-9.25995	613.09	1.71238e-25	1.51248e-24
LOC100164631	72.7526	-9.25822	612.353	2.87305e-18	1.65586e-17
LOC100572955	72.6224	-9.25545	611.179	5.83816e-19	3.48751e-18
LOC100570638	72.2517	-9.24818	608.106	3.57846e-18	2.05381e-17
LOC100571328	71.8253	-9.24005	604.69	4.59133e-19	2.7635e-18
LOC100169595	71.7188	-9.23796	603.812	3.76031e-12	1.4328e-11
LOC100166923	787.475	-9.22256	597.402	3.6693e-50	9.8579e-49
LOC100161672	70.9452	-9.2221	597.212	1.02353e-25	9.15011e-25
LOC103309243	69.1019	-9.18416	581.713	8.31521e-24	6.6706e-23
LOC100159149	68.6325	-9.1756	578.269	2.30304e-27	2.28565e-26
cp9	5952.5	-9.17279	577.145	2.38478e-10	8.02563e-10
LOC100167645	3294.93	-9.16997	576.019	1.01631e-30	1.18138e-29
LOC100573638	68.2963	-9.16699	574.829	1.36521e-05	3.05248e-05
LOC100575256	67.2775	-9.1457	566.409	1.63128e-26	1.52645e-25
LOC100167625	66.7439	-9.13463	562.078	1.28738e-21	9.0318e-21
LOC100163332	65.4293	-9.10522	550.736	2.09879e-05	4.6152e-05
LOC100161379	126.213	-9.08933	544.704	8.08613e-26	7.28882e-25
LOC100575699	64.6702	-9.08837	544.343	1.08361e-05	2.44458e-05
LOC100167078	869.622	-9.08788	544.159	3.22158e-113	3.67243e-111
LOC100169473	64.5624	-9.08572	543.344	6.04232e-14	2.59786e-13
LOC100166757	64.2946	-9.08017	541.257	1.15312e-24	9.77095e-24
LOC100169225	64.1127	-9.07658	539.911	1.94802e-23	1.52595e-22
LOC100572077	63.9728	-9.07345	538.742	9.02756e-24	7.23081e-23
LOC100572803	63.9561	-9.0726	538.426	1.96403e-23	1.53791e-22
LOC100164640	63.8874	-9.07126	537.923	2.35705e-23	1.84076e-22
LOC100162572	121.579	-9.03412	524.252	4.35803e-25	3.7797e-24
LOC100163254	223.987	-9.02654	521.505	1.97578e-21	1.3726e-20
Obp10	61.9075	-9.02535	521.077	2.30416e-20	1.49643e-19
LOC100158851	60.8361	-9.00076	512.269	5.58646e-26	5.09123e-25
LOC100569964	60.1459	-8.984	506.352	1.69518e-23	1.33295e-22
LOC100163877	59.7168	-8.97322	502.583	1.31068e-08	3.81752e-08
cp39	1647.38	-8.96799	500.764	1.88013e-19	1.15627e-18
LOC100167487	59.3372	-8.96426	499.472	1.4046e-10	4.81493e-10
LOC100169278	58.2138	-8.93653	489.965	2.59116e-09	8.01311e-09
LOC100168523	58.1297	-8.93461	489.31	9.6431e-10	3.08379e-09
LOC100161627	58.0962	-8.93392	489.079	3.40703e-19	2.06575e-18
LOC100161899	57.7685	-8.9247	485.961	1.14241e-22	8.55898e-22
LOC100161992	56.653	-8.89784	476.999	2.94763e-23	2.28985e-22
LOC100163331	78.8984	-8.89256	475.254	5.50823e-18	3.12143e-17
LOC100159518	56.3308	-8.88907	474.109	2.89798e-09	8.93249e-09
LOC103308563	56.2828	-8.88763	473.633	8.11765e-22	5.76761e-21
LOC100572203	55.8237	-8.87649	469.992	3.51745e-18	2.02048e-17
LOC103310513	4447	-8.86195	465.278	6.32993e-26	5.73795e-25
LOC100163563	54.8303	-8.85076	461.683	2.92722e-23	2.27547e-22
LOC103310238	54.5367	-8.84234	458.996	4.07888e-10	1.3429e-09
LOC100169280	407326	-8.83085	455.355	1.48918e-204	4.87718e-202
LOC100571288	53.6902	-8.82049	452.096	1.42407e-19	8.82367e-19
LOC100163372	262.753	-8.81315	449.803	1.07778e-20	7.13895e-20
LOC100574049	143.96	-8.80425	447.038	3.29614e-24	2.71819e-23
LOC100167996	5381.96	-8.80221	446.404	7.78876e-33	1.00946e-31
LOC100161545	52.7061	-8.79342	443.694	7.38577e-16	3.64222e-15
LOC100160377	52.2054	-8.7788	439.221	5.20383e-22	3.73333e-21
LOC100169526	51.7442	-8.76674	435.565	4.12958e-22	2.98234e-21
LOC100574951	3418.76	-8.7457	429.257	8.45811e-20	5.31575e-19
LOC100169294	50.9608	-8.745	429.049	1.64439e-13	6.83906e-13
LOC100169341	1167.53	-8.74336	428.561	2.41577e-14	1.06802e-13
LOC100571778	50.7747	-8.73937	427.379	1.91089e-05	4.21998e-05
LOC100573861	50.4142	-8.72904	424.33	2.14852e-05	4.72152e-05
LOC100569647	50.0948	-8.72061	421.856	3.69094e-23	2.85225e-22
LOC100162770	1236.36	-8.70072	416.081	4.68515e-55	1.47137e-53
LOC100160813	1760.15	-8.69592	414.699	2.21258e-14	9.81976e-14
LOC103308077	49.252	-8.69566	414.624	2.5753e-09	7.96763e-09
LOC100158729	68.7609	-8.69377	414.081	1.03896e-06	2.57191e-06
LOC100161339	49.1367	-8.69191	413.546	0.000183037	0.000365595
LOC100169117	49.0407	-8.68899	412.713	1.06335e-08	3.12448e-08
LOC100575642	49.0062	-8.68805	412.442	4.14604e-20	2.65751e-19
LOC100569971	48.6987	-8.67933	409.958	7.505e-13	2.99055e-12
LOC100160731	48.6246	-8.67684	409.251	1.24863e-10	4.29311e-10
LOC100161958	1251.35	-8.66616	406.233	1.14205e-32	1.46451e-31
LOC100167303	176.471	-8.65573	403.305	2.5217e-20	1.63566e-19
LOC100167549	47.8372	-8.65385	402.779	6.53672e-23	4.97316e-22
LOC100575718	606.857	-8.64256	399.642	8.29187e-15	3.78761e-14
LOC100166646	47.4243	-8.64148	399.341	1.99062e-12	7.70447e-12
LOC100169612	47.1286	-8.63217	396.773	2.54067e-20	1.64744e-19
LOC100164012	1083.15	-8.62898	395.896	1.42163e-16	7.39039e-16
LOC100573736	920.486	-8.61568	392.263	1.59046e-57	5.40626e-56
LOC100161793	756.633	-8.6017	388.482	1.58261e-19	9.78543e-19
LOC100575799	45.8161	-8.59133	385.698	5.33521e-15	2.47041e-14
LOC100164113	79461.2	-8.58922	385.134	5.66137e-74	2.86302e-72
LOC100159668	17162.6	-8.58416	383.786	4.03622e-123	5.55195e-121
LOC100168672	720.064	-8.58359	383.634	2.87839e-25	2.51332e-24
LOC100575319	164.962	-8.57922	382.475	8.23579e-27	7.8453e-26
LOC103311499	45.3377	-8.57601	381.623	9.30074e-15	4.23532e-14
LOC100161988	1398.03	-8.56796	379.5	3.38108e-09	1.03581e-08
LOC100160280	44.9617	-8.56525	378.788	2.93847e-22	2.14693e-21
LOC100164067	34225	-8.56466	378.634	2.55676e-28	2.66433e-27
LOC103307678	44.6513	-8.55393	375.828	5.12363e-11	1.80989e-10
LOC100163936	44.4666	-8.54894	374.53	1.41464e-20	9.30158e-20
LOC100572585	44.3199	-8.54347	373.113	8.05436e-17	4.24485e-16
LOC100573834	273.246	-8.53678	371.387	1.1915e-27	1.19865e-26
LOC100160311	440.943	-8.52749	369.005	1.15599e-36	1.75364e-35
LOC100570846	322.921	-8.52573	368.554	9.74334e-14	4.12802e-13
LOC100568665	43.7429	-8.52371	368.038	4.49876e-14	1.94965e-13
cp36	2344.96	-8.52219	367.649	1.66426e-15	7.99691e-15
LOC100169358	234.059	-8.51979	367.04	7.2116e-39	1.21368e-37
LOC100571736	43.4616	-8.51535	365.912	7.16312e-22	5.10877e-21
LOC100163904	43.4427	-8.51422	365.625	7.48242e-06	1.71577e-05
LOC100572516	532.247	-8.50673	363.732	1.10509e-34	1.5469e-33
LOC100166732	4569.75	-8.50355	362.931	6.91904e-20	4.37245e-19
LOC100160373	42.7734	-8.49211	360.065	3.81515e-05	8.16069e-05
LOC100161209	42.6484	-8.48823	359.096	7.07377e-18	3.98018e-17
LOC100159024	73836.5	-8.47458	355.715	7.77361e-43	1.56024e-41
LOC100568531	41.9173	-8.46394	353.101	6.6224e-21	4.44213e-20
cp5	4870.15	-8.45233	350.271	1.55996e-17	8.5694e-17
LOC100165139	292.89	-8.44988	349.677	5.68144e-23	4.34812e-22
LOC100575018	41.2483	-8.43784	346.77	5.70838e-21	3.84528e-20
LOC100163329	41.1776	-8.43645	346.436	3.92501e-22	2.84157e-21
LOC100574328	8592.69	-8.411	340.379	5.05705e-17	2.70878e-16
LOC100574853	40.2788	-8.4052	339.014	3.13585e-20	2.02257e-19
LOC100568588	39.4823	-8.37711	332.476	7.72084e-16	3.8011e-15
LOC100570052	76.4218	-8.36333	329.316	9.82039e-20	6.15504e-19
LOC100167273	137.371	-8.35634	327.724	2.46715e-26	2.28888e-25
LOC100162251	38.5815	-8.34226	324.541	2.98877e-21	2.05011e-20
LOC100164643	38.4537	-8.3383	323.653	0.00201154	0.00357856
LOC100570379	37.9981	-8.32093	319.778	2.062e-11	7.48641e-11
LOC100160310	12390.7	-8.3196	319.485	3.26531e-68	1.45514e-66
LOC100570079	52.7571	-8.31127	317.645	1.88002e-14	8.37625e-14
Obp6	307.804	-8.30849	317.033	1.58147e-42	3.12853e-41
cp18	1035.46	-8.29841	314.826	2.31622e-14	1.02577e-13
LOC100160462	37.351	-8.29653	314.416	1.13309e-11	4.18228e-11
LOC100573764	37.1738	-8.28917	312.817	2.08777e-22	1.54232e-21
LOC100573177	37.1073	-8.28696	312.337	0.00216279	0.00383507
cp17	8731.04	-8.28629	312.193	6.04255e-29	6.48004e-28
LOC100158790	301.729	-8.27067	308.831	2.23166e-09	6.93356e-09
LOC100569882	36.5991	-8.26705	308.057	4.39796e-15	2.05208e-14
LOC100161786	7392.54	-8.25806	306.142	1.53644e-17	8.44242e-17
LOC100570053	36.2547	-8.25402	305.286	8.26073e-20	5.19645e-19
LOC100166866	35.5661	-8.22608	299.431	8.5262e-21	5.6822e-20
cp35	1814.35	-8.22246	298.68	1.66069e-11	6.06783e-11
cp1	11595.1	-8.22216	298.618	1.0563e-34	1.47962e-33
cp34	2745.54	-8.21428	296.992	2.16004e-24	1.80146e-23
LOC100162698	125.197	-8.21187	296.497	3.15028e-27	3.09965e-26
LOC100162032	250.266	-8.20819	295.741	7.18608e-44	1.50988e-42
LOC100167869	35.0654	-8.20468	295.023	3.92761e-21	2.67013e-20
LOC100162699	240.742	-8.19638	293.33	1.02207e-33	1.38013e-32
LOC100571166	34.7574	-8.19292	292.628	2.10107e-19	1.28907e-18
LOC103309121	34.576	-8.18465	290.954	3.10702e-19	1.8855e-18
LOC100167286	34.4294	-8.17934	289.886	3.62479e-21	2.46996e-20
LOC100168180	119.608	-8.17177	288.368	8.12112e-23	6.13111e-22
LOC100162891	34.1119	-8.16597	287.212	8.3267e-19	4.92984e-18
LOC100573178	34.0111	-8.16229	286.48	1.0976e-19	6.85852e-19
LOC100166267	124.037	-8.16075	286.175	1.37866e-23	1.09197e-22
LOC100159243	268.017	-8.1378	281.657	8.91945e-22	6.32858e-21
LOC100163607	1535.44	-8.12736	279.628	1.86026e-30	2.12529e-29
LOC100159204	330.043	-8.1268	279.519	7.82263e-13	3.11171e-12
LOC100569458	87.1791	-8.12186	278.564	3.5684e-16	1.80281e-15
LOC100166593	33.031	-8.12026	278.255	1.23442e-20	8.15066e-20
LOC100166530	5976.83	-8.11746	277.714	1.68039e-17	9.21135e-17
LOC100574670	32.9609	-8.11692	277.611	1.29573e-16	6.74779e-16
LOC100161378	32.8476	-8.11107	276.488	5.3325e-21	3.59913e-20
cp33	2842.45	-8.10748	275.8	6.39738e-20	4.04899e-19
LOC100165319	143.529	-8.10575	275.469	2.40396e-12	9.26772e-12
LOC100165592	110.142	-8.10396	275.129	8.05187e-16	3.95841e-15
LOC100572659	32.4124	-8.09419	273.272	1.27098e-20	8.3837e-20
LOC100164444	10656.9	-8.09399	273.234	9.05511e-30	1.00018e-28
LOC103310307	32.4104	-8.09253	272.957	5.74724e-19	3.43519e-18
LOC100168223	2921.92	-8.08652	271.823	8.15136e-10	2.62382e-09
cp38	4104.83	-8.07771	270.167	4.29687e-21	2.91348e-20
LOC100573884	31.7551	-8.06065	266.991	1.30284e-20	8.58836e-20
cp20	2298.45	-8.06016	266.9	1.23731e-22	9.24645e-22
LOC100571266	31.5274	-8.05246	265.479	1.01754e-18	5.99e-18
LOC100572222	31.3057	-8.04316	263.774	2.32231e-19	1.41932e-18
LOC100164310	1257.82	-8.04028	263.249	3.48589e-114	4.08661e-112
LOC100160618	243.089	-8.02656	260.757	1.45565e-15	7.03548e-15
LOC100571087	30.8166	-8.01812	259.236	1.75766e-19	1.08386e-18
LOC100574768	30.6891	-8.01387	258.473	3.57749e-20	2.30166e-19
cp47	31690.8	-8.01294	258.306	7.03175e-51	1.92422e-49
LOC100169647	241.692	-8.00276	256.491	3.31824e-45	7.37771e-44
LOC100569031	30.4252	-8.00261	256.463	1.74511e-20	1.14271e-19
LOC100167634	30.4509	-8.0018	256.32	0.00289774	0.00505487
LOC103308509	6272.15	-7.99763	255.579	1.10118e-15	5.36875e-15
LOC100160324	30.3412	-7.99577	255.251	7.09777e-17	3.75798e-16
LOC100162609	16761.8	-7.99458	255.039	4.35904e-149	7.88947e-147
LOC100574091	30.2728	-7.99439	255.007	4.67098e-18	2.65719e-17
LOC100573953	29.5366	-7.95784	248.626	5.2321e-06	1.21721e-05
LOC103308552	29.3607	-7.94934	247.167	3.90439e-08	1.09174e-07
LOC100166712	24443.7	-7.94706	246.776	2.50092e-28	2.60877e-27
LOC100574097	28.7642	-7.92252	242.614	2.96087e-20	1.9127e-19
LOC100164250	372.331	-7.92029	242.239	6.38193e-13	2.55339e-12
LOC100572798	101.648	-7.9199	242.174	7.08603e-24	5.72011e-23
LOC100164692	28.6811	-7.91626	241.564	2.0547e-16	1.05512e-15
LOC100160351	100.653	-7.91396	241.178	1.12529e-22	8.43679e-22
cp19	4349.94	-7.91104	240.691	4.87549e-17	2.61356e-16
LOC100159625	28.5666	-7.91051	240.603	3.90273e-19	2.35522e-18
cp41	8043.93	-7.90921	240.387	6.49915e-33	8.46572e-32
LOC100573082	28.4252	-7.90287	239.332	5.70498e-12	2.14527e-11
LOC100166860	152.155	-7.89905	238.699	1.8564e-31	2.2452e-30
LOC100158958	1546.86	-7.89173	237.491	5.47871e-48	1.35057e-46
LOC100169376	35985.2	-7.89083	237.344	5.26814e-25	4.55182e-24
LOC100161284	150.991	-7.89049	237.287	8.82705e-29	9.37357e-28
LOC100570346	28.0344	-7.88253	235.981	0.00381765	0.00654449
LOC100166656	969.627	-7.8737	234.541	2.49697e-42	4.902e-41
LOC100162877	27.7524	-7.86819	233.648	4.37642e-08	1.21915e-07
LOC100167181	27.5125	-7.85556	231.612	4.01023e-08	1.12012e-07
LOC100573439	27.4552	-7.85164	230.983	5.29514e-14	2.28184e-13
LOC100571916	27.2702	-7.84267	229.551	0.000101809	0.000208541
LOC103307990	27.1069	-7.83434	228.229	1.66878e-16	8.6339e-16
LOC103309167	27.0521	-7.83103	227.706	0.00560783	0.00938261
LOC100160737	107222	-7.82021	226.005	2.60216e-47	6.27957e-46
LOC100574775	26.8446	-7.82021	226.004	0.000129443	0.000262589
LOC100166605	242.409	-7.81947	225.889	4.94942e-09	1.49585e-08
LOC100160312	26.6383	-7.80936	224.312	4.70938e-18	2.67821e-17
LOC100162732	2085.03	-7.80896	224.249	8.07768e-41	1.47623e-39
LOC100574673	299.493	-7.80115	223.039	8.19431e-17	4.3175e-16
LOC100166302	26.4466	-7.7987	222.66	5.12694e-06	1.19409e-05
LOC100569077	22578	-7.79172	221.586	5.93617e-55	1.85859e-53
LOC100574541	374.941	-7.79163	221.572	8.57828e-25	7.33509e-24
LOC100165079	3348.99	-7.79132	221.525	4.4779e-64	1.80454e-62
LOC100162574	112.776	-7.78713	220.882	6.84467e-15	3.14605e-14
cp58	362.666	-7.78671	220.818	3.81262e-14	1.66137e-13
LOC100570417	71.258	-7.78554	220.638	2.4625e-15	1.16775e-14
LOC100168127	25.8432	-7.76719	217.85	1.50213e-18	8.76261e-18
LOC100163065	25.7599	-7.76207	217.078	3.54328e-17	1.91484e-16
LOC100573156	35.7584	-7.74973	215.229	3.9753e-07	1.02005e-06
LOC100570631	25.5384	-7.74694	214.814	8.57283e-14	3.64332e-13
cp37	1534.11	-7.74583	214.649	7.12519e-16	3.5154e-15
LOC100569723	109.269	-7.73918	213.662	4.9434e-22	3.5502e-21
LOC103310321	25.3497	-7.7373	213.382	0.000118155	0.000240614
LOC100302322	5978.84	-7.73689	213.322	1.70145e-25	1.50347e-24
cprr1-11	26935.8	-7.73598	213.187	1.21914e-25	1.08425e-24
LOC103310009	25.2527	-7.73095	212.446	2.1626e-18	1.25234e-17
LOC100162466	1596.35	-7.73049	212.378	1.02159e-16	5.34715e-16
LOC100569758	49.2183	-7.7266	211.805	9.53976e-18	5.32559e-17
LOC100160727	2559.16	-7.72562	211.662	2.53893e-29	2.76442e-28
LOC100163612	134.829	-7.72527	211.611	5.33906e-36	7.84063e-35
LOC100571906	25.044	-7.71972	210.798	1.14146e-07	3.07465e-07
LOC100575526	154.072	-7.71842	210.608	1.77646e-14	7.92682e-14
LOC103310237	24.9203	-7.7122	209.703	1.1553e-07	3.1107e-07
LOC100575035	24.8382	-7.70927	209.277	5.03519e-17	2.69777e-16
LOC100168669	24.8143	-7.70753	209.024	3.98366e-18	2.27813e-17
LOC103309462	24.746	-7.70303	208.373	1.40008e-05	3.12807e-05
cp28	7864.15	-7.70302	208.372	3.24428e-27	3.1891e-26
LOC103310367	11150.3	-7.69246	206.853	4.47766e-88	3.07958e-86
LOC100568743	24.2856	-7.67524	204.399	3.82755e-05	8.18636e-05
LOC100167699	173.219	-7.67368	204.178	9.55565e-34	1.29202e-32
LOC103307681	24.1815	-7.66973	203.619	3.16219e-05	6.82484e-05
LOC100572111	24.0216	-7.66183	202.507	3.51091e-16	1.7755e-15
LOC100574264	23.9755	-7.65749	201.899	5.41948e-17	2.8954e-16
Catb-3098	101.634	-7.65631	201.734	1.04792e-18	6.16355e-18
LOC103310638	5192.51	-7.65204	201.138	3.2274e-17	1.74688e-16
LOC100568841	127.158	-7.64865	200.665	2.24972e-30	2.55749e-29
LOC103311830	894.522	-7.64335	199.93	6.97802e-102	6.10074e-100
LOC100164941	6432.22	-7.6421	199.756	7.99103e-55	2.49439e-53
LOC100574032	59.1091	-7.60028	194.049	6.81504e-09	2.03671e-08
LOC100159647	92478.7	-7.59417	193.229	1.63641e-134	2.65858e-132
LOC100162621	22.8549	-7.5882	192.432	2.37142e-10	7.98199e-10
LOC100165420	135.922	-7.57222	190.311	3.08109e-28	3.20424e-27
LOC100159502	554.172	-7.56762	189.705	3.72148e-41	6.92382e-40
LOC100161711	22.4391	-7.56173	188.933	8.91631e-09	2.6353e-08
LOC100569903	2260.02	-7.56009	188.719	1.07842e-43	2.23854e-42
LOC100162054	22.387	-7.55655	188.256	9.58617e-18	5.35005e-17
LOC100570517	22.3276	-7.55648	188.246	1.05569e-16	5.52283e-16
LOC100160252	3408.43	-7.54587	186.868	4.02829e-24	3.3048e-23
LOC100570619	1556.51	-7.54428	186.661	3.59311e-16	1.81485e-15
LOC100162901	59.2179	-7.53686	185.703	5.49503e-18	3.11481e-17
LOC100570858	22.0239	-7.53561	185.543	7.78159e-15	3.55924e-14
LOC100164906	6526.07	-7.53068	184.91	2.47011e-24	2.05031e-23
LOC100568773	21.9067	-7.52824	184.598	9.48713e-18	5.29765e-17
LOC100168355	21.8983	-7.52785	184.548	6.08968e-17	3.2392e-16
ACYPI53853	439.965	-7.52203	183.804	1.35026e-39	2.34709e-38
LOC100569228	21.7885	-7.51904	183.425	4.31037e-15	2.01258e-14
LOC100569780	21.7349	-7.51565	182.993	4.83997e-16	2.41975e-15
LOC100168836	1635.85	-7.50336	181.442	7.47978e-57	2.4892e-55
LOC100163845	114.697	-7.49054	179.836	8.19365e-32	1.01355e-30
LOC103310836	21.2484	-7.48127	178.684	1.86535e-16	9.61471e-16
LOC100573117	21.1122	-7.47551	177.973	5.00693e-18	2.8436e-17
LOC100168540	1402.42	-7.46962	177.248	1.14561e-19	7.14987e-19
cp29	11631.7	-7.46946	177.227	1.55032e-31	1.88496e-30
LOC103310479	20.9796	-7.46237	176.359	5.56802e-18	3.15185e-17
LOC103308950	20.876	-7.45754	175.769	2.93244e-12	1.12463e-11
LOC100166489	90.9954	-7.45242	175.146	1.03322e-23	8.25017e-23
LOC100574890	56.5232	-7.44788	174.596	6.68287e-06	1.54013e-05
LOC100571706	20.593	-7.4378	173.381	3.965e-17	2.13491e-16
LOC100158791	185.758	-7.43508	173.055	1.11628e-50	3.03855e-49
LOC100159839	338.43	-7.43187	172.669	4.82964e-06	1.12739e-05
LOC100575185	20.5008	-7.43135	172.608	6.92677e-13	2.76816e-12
LOC100574967	700.749	-7.43063	172.521	3.58979e-96	2.84877e-94
LOC100163848	3889.74	-7.41626	170.811	4.12024e-77	2.22547e-75
LOC100165895	2198.18	-7.40052	168.958	1.4561e-35	2.10538e-34
LOC100575892	20.0012	-7.39677	168.519	2.10634e-14	9.36843e-14
LOC100574415	19.9925	-7.39599	168.429	7.69156e-12	2.86824e-11
cp31	1759.53	-7.39149	167.904	1.25861e-24	1.06386e-23
LOC100168676	6914.98	-7.38445	167.086	9.38508e-27	8.88675e-26
LOC100160955	1564.03	-7.38385	167.016	1.26956e-24	1.07224e-23
cp12	6491.97	-7.37894	166.449	7.93453e-25	6.79026e-24
LOC100571105	19.7103	-7.37403	165.884	2.24161e-07	5.88062e-07
LOC100164878	19.6405	-7.3721	165.662	6.72572e-17	3.56557e-16
LOC100164203	353.536	-7.36796	165.188	2.79577e-08	7.91074e-08
LOC100167112	19.5375	-7.36066	164.354	7.76722e-17	4.09875e-16
LOC100162445	1640.44	-7.34722	162.83	7.23905e-06	1.66218e-05
LOC100161806	315.532	-7.34478	162.554	7.88455e-09	2.34311e-08
LOC100165253	345.105	-7.34265	162.314	1.56039e-21	1.08916e-20
Mf	44472.4	-7.32876	160.76	8.5009e-172	1.90651e-169
LOC100162634	129.067	-7.32744	160.612	5.27251e-06	1.22619e-05
LOC100164660	282.043	-7.32711	160.576	1.20603e-19	7.51327e-19
LOC100169531	19.019	-7.32196	160.004	1.89007e-12	7.32218e-12
LOC100568961	18.9066	-7.31581	159.323	4.66592e-16	2.33669e-15
LOC100573057	84.7118	-7.3118	158.881	3.06953e-23	2.38007e-22
LOC100568890	266.714	-7.30583	158.225	4.01899e-54	1.21768e-52
LOC100167838	823.91	-7.30005	157.592	2.0928e-50	5.66677e-49
LOC100576009	18.7046	-7.29962	157.545	2.52642e-14	1.11503e-13
LOC100571623	82.494	-7.29314	156.839	9.46339e-13	3.74273e-12
LOC103308439	26.0693	-7.29076	156.58	3.27996e-16	1.66483e-15
LOC100161300	18.585	-7.28944	156.437	2.61448e-07	6.82929e-07
LOC100166316	1164.58	-7.28866	156.352	1.83409e-08	5.27425e-08
LOC100169105	50.5114	-7.28574	156.037	4.19981e-14	1.82431e-13
LOC100576074	18.4478	-7.27832	155.236	8.98355e-07	2.23592e-06
LOC100572394	5837.27	-7.26962	154.303	1.70293e-85	1.10492e-83
LOC100570722	18.2567	-7.26371	153.672	0.000316111	0.000615413
LOC100167874	313.063	-7.26074	153.356	1.18084e-27	1.1885e-26
LOC100161507	18.2194	-7.25932	153.205	1.03059e-15	5.03415e-15
LOC100167468	1080.57	-7.24732	151.936	4.38233e-08	1.22058e-07
LOC103310637	183.617	-7.24315	151.498	7.91757e-17	4.17488e-16
LOC100163348	178.676	-7.23279	150.414	3.6603e-12	1.39702e-11
LOC100574895	17.8193	-7.23115	150.242	1.02301e-14	4.64419e-14
LOC100569517	95.9301	-7.22745	149.858	3.25981e-28	3.38328e-27
LOC100168093	127.711	-7.22684	149.794	2.54624e-35	3.65854e-34
LOC100169221	34.8643	-7.22649	149.758	7.28533e-17	3.8553e-16
LOC100161772	7091.91	-7.22395	149.494	2.39289e-110	2.50622e-108
LOC100159730	17.7312	-7.22246	149.34	1.04355e-13	4.41583e-13
LOC100575539	17.657	-7.21584	148.656	4.03013e-06	9.47944e-06
LOC100574641	63.0306	-7.20789	147.839	1.88505e-18	1.09407e-17
cp72	4808.19	-7.20387	147.428	8.41965e-112	9.09542e-110
LOC100569062	17.5485	-7.20379	147.421	5.9045e-17	3.14313e-16
LOC100159210	285.916	-7.20262	147.301	1.14099e-08	3.34215e-08
LOC100570556	323.446	-7.20184	147.221	1.17105e-08	3.42776e-08
LOC100161439	684.522	-7.20164	147.201	2.33874e-28	2.44578e-27
LOC100166678	29162	-7.19454	146.478	3.47079e-94	2.66219e-92
LOC100159162	458.209	-7.19314	146.335	1.1658e-13	4.90697e-13
LOC100162060	467.342	-7.19203	146.223	4.2263e-17	2.27146e-16
LOC100575359	9755.48	-7.19139	146.158	2.80889e-24	2.32474e-23
LOC103310566	17.3251	-7.18916	145.933	1.56855e-13	6.53553e-13
LOC100159663	323.207	-7.18904	145.921	1.02886e-54	3.17791e-53
LOC100569732	17.2749	-7.18684	145.698	1.3603e-15	6.58544e-15
LOC100169101	430.08	-7.18549	145.562	8.06059e-18	4.52187e-17
LOC100573357	17.1897	-7.17814	144.822	4.38298e-13	1.77391e-12
LOC100160882	300.735	-7.17307	144.314	5.26342e-27	5.08666e-26
LOC103310382	17.1462	-7.17303	144.31	0.000444627	0.000852443
LOC100164736	17.135	-7.17279	144.286	2.475e-09	7.66537e-09
LOC100159691	242.637	-7.17144	144.152	2.356e-54	7.24462e-53
LOC100573224	33.443	-7.16537	143.547	4.74153e-10	1.55412e-09
LOC100164275	17.0337	-7.16498	143.508	2.1868e-14	9.71372e-14
LOC100161691	18161	-7.16468	143.477	7.7036e-99	6.25781e-97
LOC100159632	9532.35	-7.15618	142.634	2.04973e-87	1.37312e-85
LOC100165083	3949.71	-7.14894	141.921	2.90643e-19	1.76689e-18
LOC100160524	941.155	-7.14416	141.451	1.78786e-19	1.10149e-18
LOC100570406	16.7737	-7.14303	141.34	7.63741e-15	3.49717e-14
LOC100166087	74.1644	-7.14143	141.184	5.19753e-24	4.2254e-23
LOC100167769	64350.1	-7.13045	140.113	3.09797e-92	2.31596e-90
LOC100572241	16.6554	-7.12938	140.009	5.10159e-15	2.36595e-14
LOC100165533	6432.63	-7.1274	139.817	4.19443e-96	3.30319e-94
LOC100166386	45.5963	-7.12464	139.55	3.77189e-15	1.76795e-14
LOC100570958	16.4741	-7.11592	138.709	8.01589e-14	3.41578e-13
LOC100159738	89.9845	-7.10708	137.862	4.8681e-28	4.99968e-27
LOC100572479	36825.4	-7.10665	137.821	2.62706e-29	2.85887e-28
LOC100164760	136369	-7.10314	137.486	1.62422e-87	1.09877e-85
LOC103310850	31.9393	-7.09694	136.896	4.40805e-13	1.78371e-12
LOC100571180	169.349	-7.09628	136.833	5.94444e-38	9.55976e-37
LOC100573786	16.1956	-7.09423	136.64	2.80221e-16	1.42902e-15
LOC100573339	146.43	-7.09263	136.488	1.10903e-46	2.61515e-45
LOC100159388	16.1968	-7.09005	136.244	1.64975e-14	7.37772e-14
LOC100158708	16.1697	-7.08854	136.101	0.000439376	0.000842688
LOC100569166	31.4717	-7.08037	135.333	3.24764e-15	1.52918e-14
Obp2	7116.11	-7.07699	135.016	1.37242e-80	7.97664e-79
LOC100165478	57.635	-7.0762	134.942	4.84754e-19	2.91431e-18
LOC100571059	15.9061	-7.06802	134.18	2.68819e-14	1.18491e-13
LOC100575280	15.8807	-7.06411	133.816	7.75762e-16	3.81738e-15
LOC100166049	237.783	-7.06392	133.799	1.13881e-62	4.43341e-61
LOC100572990	15.8577	-7.06153	133.577	1.03111e-14	4.6789e-14
LOC100159572	15.7405	-7.05084	132.591	5.37237e-13	2.16162e-12
LOC100164796	15.6081	-7.04	131.599	6.07988e-13	2.43727e-12
LOC100161343	83.6947	-7.03919	131.524	1.16283e-23	9.24577e-23
LOC103309732	30.58	-7.03798	131.414	3.11795e-16	1.58572e-15
LOC100161839	15.5563	-7.03271	130.936	5.59674e-06	1.29823e-05
LOC100571647	15.5035	-7.02999	130.688	1.24701e-12	4.88412e-12
LOC103310612	15.5178	-7.02935	130.631	3.02374e-14	1.32657e-13
LOC103309028	15.4937	-7.02912	130.61	1.0276e-15	5.02071e-15
LOC100570172	52315.4	-7.02832	130.537	6.35418e-18	3.5831e-17
LOC100168087	209.812	-7.02655	130.377	8.27773e-20	5.20556e-19
LOC100168754	53275.6	-7.02114	129.889	2.88282e-32	3.63355e-31
LOC100168865	155.341	-7.02047	129.829	9.36379e-13	3.70547e-12
LOC100569942	82.8848	-7.0191	129.706	6.80163e-23	5.16139e-22
LOC100169480	5167.02	-7.01605	129.432	1.42619e-72	6.98969e-71
LOC100572464	107.463	-7.00725	128.645	2.53824e-13	1.04513e-12
LOC100569913	655.678	-7.00042	128.037	4.97021e-137	8.20403e-135
LOC100159283	68.2813	-6.99584	127.632	1.84971e-25	1.63169e-24
LOC100568691	215.637	-6.99248	127.334	3.8022e-17	2.04993e-16
LOC100165667	1445.14	-6.98859	126.991	1.68771e-33	2.26708e-32
LOC103307651	15.0779	-6.98794	126.935	5.49684e-15	2.54176e-14
LOC100159991	1022.37	-6.98162	126.38	3.46457e-17	1.87328e-16
LOC100161240	20126.6	-6.97827	126.087	4.87816e-49	1.26287e-47
LOC100160189	14.8097	-6.96292	124.752	1.15072e-13	4.84942e-13
LOC100572837	14.8231	-6.9613	124.612	6.21092e-07	1.56567e-06
LOC100569943	14.8007	-6.96081	124.569	2.1714e-06	5.22357e-06
LOC100164245	668.418	-6.96066	124.556	2.08643e-16	1.07114e-15
LOC100162013	98.3224	-6.95382	123.968	5.52476e-20	3.51611e-19
LOC100165403	116.348	-6.95379	123.965	1.32797e-13	5.56683e-13
Intu	191.189	-6.95323	123.917	2.96623e-10	9.90008e-10
LOC100159939	56025.5	-6.94813	123.48	1.87621e-20	1.22506e-19
LOC100166927	6970.65	-6.94357	123.09	0	0
LOC100302335	14.5902	-6.94146	122.91	1.45244e-13	6.07504e-13
LOC100165262	514.401	-6.93976	122.765	4.19317e-33	5.51771e-32
LOC103308440	20.4247	-6.93796	122.612	2.92823e-12	1.12343e-11
LOC103310851	14.4782	-6.929	121.853	4.62409e-06	1.08119e-05
LOC100573528	109.871	-6.92085	121.166	1.57244e-25	1.39186e-24
LOC100160911	769.801	-6.92017	121.11	1.33395e-61	5.07811e-60
LOC100163727	215.172	-6.91889	121.002	8.20569e-49	2.1006e-47
LOC100161160	401.389	-6.91367	120.565	1.37433e-13	5.75769e-13
LOC100571379	78.7426	-6.91234	120.454	5.87851e-24	4.76213e-23
LOC100159472	48535.6	-6.91097	120.34	1.80791e-43	3.70801e-42
LOC100164178	102.715	-6.91061	120.31	2.25189e-32	2.85576e-31
LOC100568493	812.309	-6.9011	119.519	1.06818e-08	3.13779e-08
LOC100169085	14.1089	-6.89514	119.026	2.86221e-14	1.25839e-13
LOC100167562	2061.82	-6.89367	118.905	7.87835e-24	6.33492e-23
LOC100570692	100.982	-6.89327	118.873	1.09139e-24	9.26313e-24
LOC100575419	14.1201	-6.89286	118.839	4.13426e-13	1.67687e-12
LOC100574301	14.0745	-6.89067	118.658	2.1053e-14	9.3658e-14
LOC103311473	91.0904	-6.88704	118.36	9.44822e-26	8.46851e-25
LOC100167055	4687.89	-6.87742	117.573	4.91497e-85	3.13964e-83
LOC100574950	13.9144	-6.87195	117.128	2.59221e-15	1.22728e-14
LOC100158737	102.04	-6.86543	116.601	1.30428e-17	7.20706e-17
LOC100159754	37.7376	-6.86432	116.51	8.24545e-14	3.50997e-13
LOC100575312	13.7917	-6.85889	116.073	0.0111344	0.0179369
LOC100572968	6845.99	-6.85488	115.751	4.6705e-110	4.81833e-108
LOC100163170	2245.46	-6.85091	115.432	1.58726e-71	7.59857e-70
LOC103311238	37.3845	-6.85069	115.415	8.34938e-15	3.81303e-14
LOC103308931	84.9968	-6.84905	115.284	8.08461e-16	3.97261e-15
LOC100165374	13.6854	-6.84616	115.053	1.35045e-13	5.65993e-13
LOC100159216	72.7076	-6.84181	114.707	1.92562e-15	9.22269e-15
LOC100158915	347.004	-6.84018	114.578	9.51343e-33	1.22452e-31
LOC103311546	13.5582	-6.83571	114.223	6.50063e-14	2.79025e-13
Catb-16d2	274.259	-6.83364	114.06	2.12189e-19	1.30107e-18
LOC100158825	88.9983	-6.83325	114.028	3.37805e-25	2.94214e-24
LOC100162863	13.5366	-6.83282	113.994	1.60062e-13	6.66241e-13
LOC100161927	5093.18	-6.82881	113.678	1.31581e-56	4.33e-55
LOC100573120	13.4837	-6.8255	113.418	1.95107e-07	5.14261e-07
LOC100570548	36.7663	-6.82517	113.392	1.25902e-15	6.11086e-15
LOC100169131	1460.69	-6.82506	113.383	2.27834e-20	1.48153e-19
LOC100168453	18889.6	-6.8193	112.931	2.49783e-30	2.8333e-29
LOC100160573	1248.46	-6.81804	112.833	3.50494e-08	9.83108e-08
LOC103308549	13.3991	-6.81797	112.827	0.00133431	0.00242391
LOC100160187	4871.71	-6.81641	112.705	1.09455e-147	1.96381e-145
cp57	105.469	-6.81639	112.704	1.37666e-08	4.00234e-08
ORF3	7324.31	-6.81601	112.674	1.68447e-85	1.09639e-83
LOC103307628	13.3082	-6.80749	112.011	9.86133e-09	2.90504e-08
LOC100159417	13.2877	-6.80456	111.783	3.63285e-14	1.58403e-13
LOC100569593	2522.53	-6.80445	111.775	2.48965e-78	1.3735e-76
LOC100573991	13.2442	-6.80073	111.487	5.45902e-11	1.92474e-10
LOC100159868	242.232	-6.79936	111.381	1.16121e-14	5.24271e-14
LOC100166363	334.095	-6.79303	110.894	1.15369e-52	3.37168e-51
LOC103308343	13.0357	-6.77905	109.824	4.24498e-14	1.84354e-13
LOC100571823	12.9229	-6.76844	109.019	8.77414e-13	3.47613e-12
LOC100161312	286.482	-6.76779	108.971	1.68705e-07	4.47243e-07
LOC100167240	47.6752	-6.76573	108.815	1.21951e-13	5.12782e-13
LOC100568543	2709.92	-6.76416	108.696	7.11698e-13	2.84197e-12
LOC100161256	35.0968	-6.75743	108.19	2.3938e-14	1.05922e-13
LOC100160518	46.2654	-6.74012	106.9	4.01576e-18	2.29585e-17
LOC100160420	12.6862	-6.73919	106.831	9.99334e-10	3.19085e-09
LOC100568861	250.435	-6.73665	106.643	1.66972e-38	2.74731e-37
LOC100164870	1361.23	-6.73447	106.482	0.000217776	0.000431101
LOC100162489	17178.5	-6.73174	106.281	1.6905e-180	4.36002e-178
LOC100575903	12.5773	-6.72842	106.036	3.30758e-11	1.18358e-10
LOC100575627	12.5005	-6.72006	105.424	1.51282e-13	6.3148e-13
LOC100569548	46.5422	-6.71907	105.352	3.44092e-12	1.31475e-11
LOC100165042	419.41	-6.71838	105.301	4.35261e-21	2.94934e-20
LOC103309553	159.352	-6.70403	104.259	1.89732e-09	5.92514e-09
LOC103307697	64.6031	-6.70382	104.244	4.30345e-21	2.91698e-20
cprr1-10	1952.65	-6.69989	103.96	8.96562e-24	7.18399e-23
LOC100160459	174.711	-6.69911	103.904	9.77955e-09	2.88177e-08
LOC100574727	12.3522	-6.69864	103.87	4.02614e-10	1.32638e-09
LOC100569007	12.3308	-6.69798	103.823	0.000873827	0.0016205
LOC100163225	12.287	-6.69213	103.403	9.30493e-13	3.68288e-12
LOC100166366	12.2556	-6.68813	103.117	1.1062e-13	4.66943e-13
LOC100165963	4949.34	-6.68355	102.789	3.55306e-23	2.74983e-22
LOC100166739	167.884	-6.67776	102.378	9.80074e-17	5.13897e-16
LOC100159280	903.306	-6.67529	102.203	8.47908e-13	3.36246e-12
LOC103310510	43.336	-6.66398	101.405	1.61024e-15	7.74633e-15
LOC100167326	12.0383	-6.66319	101.349	0.000778399	0.00145241
LOC100160776	40.2776	-6.65731	100.937	2.98966e-10	9.97504e-10
LOC100169160	409.989	-6.65532	100.797	6.58709e-88	4.50038e-86
LOC100572399	70566.1	-6.65002	100.428	1.47092e-32	1.8804e-31
LOC100572094	11.9286	-6.64958	100.398	0.000270058	0.000529417
LOC100165910	42.7803	-6.64726	100.236	8.29683e-17	4.3704e-16
LOC100569533	203.804	-6.64253	99.9082	1.37771e-44	2.97036e-43
LOC100570101	11.871	-6.64237	99.8972	0.000956774	0.00176797
LOC100573938	64.0265	-6.64055	99.7708	1.01484e-23	8.10657e-23
cprr1-2	2314.48	-6.63461	99.3615	3.25908e-07	8.43828e-07
cprr1-4	3178.06	-6.62584	98.7589	1.64715e-10	5.61282e-10
LOC100163560	30005.3	-6.62529	98.7216	2.77927e-23	2.16314e-22
LOC100576073	31.3197	-6.62274	98.5471	4.93557e-13	1.9917e-12
cp60	633.843	-6.62269	98.5435	3.54352e-27	3.47167e-26
LOC100572892	11.6113	-6.6148	98.0061	4.71309e-13	1.90416e-12
LOC100573750	31.7379	-6.613	97.8842	2.14141e-14	9.51619e-14
LOC103307910	11.5941	-6.60782	97.5332	2.95934e-09	9.11479e-09
LOC100569285	11.5678	-6.60732	97.4993	1.16188e-11	4.28474e-11
LOC100163444	95.9415	-6.60628	97.4293	5.23516e-27	5.06172e-26
LOC100158826	2893.57	-6.60618	97.4222	6.92569e-21	4.64105e-20
LOC100571284	11.521	-6.60274	97.1903	2.56296e-13	1.05468e-12
LOC100575331	39.8059	-6.59921	96.9527	8.62683e-10	2.76953e-09
LOC103309600	16.1616	-6.59403	96.6053	1.66922e-12	6.49462e-12
LOC100163553	92.965	-6.59397	96.6013	5.37305e-33	7.04333e-32
LOC100169018	3024.48	-6.58948	96.3011	1.81731e-43	3.72359e-42
LOC100159923	11.4242	-6.588	96.202	3.10034e-08	8.73777e-08
LOC100571148	634.453	-6.58539	96.0287	1.39838e-23	1.10589e-22
LOC100162207	11.3671	-6.58157	95.7745	1.123e-12	4.41516e-12
LOC100168228	11.3619	-6.57988	95.6627	0.0146073	0.023136
LOC100160535	11.3577	-6.57881	95.5918	8.99694e-12	3.33994e-11
LOC100568735	129.643	-6.57802	95.5394	1.50736e-37	2.38142e-36
LOC100575943	41.0806	-6.55698	94.1559	2.95272e-15	1.39349e-14
LOC100575574	11.1283	-6.54943	93.6646	0.0153522	0.0242487
LOC100568668	11.1098	-6.54896	93.6339	4.76852e-14	2.06223e-13
cp70	58.3651	-6.54857	93.6087	3.12516e-09	9.60689e-09
LOC100573412	121.232	-6.54387	93.3044	1.90157e-19	1.1691e-18
LOC103311148	694.344	-6.54196	93.181	7.04988e-07	1.76996e-06
LOC100160413	1998.15	-6.53944	93.0182	6.8597e-179	1.70526e-176
LOC100574617	11.045	-6.53823	92.94	0.00114051	0.00208766
LOC100159222	280.576	-6.53202	92.5409	2.31563e-17	1.25898e-16
LOC100159128	87.0294	-6.53195	92.5362	1.20888e-11	4.45409e-11
LOC100160819	1420.79	-6.51394	91.3882	0.000176254	0.000352765
LOC100166952	710.343	-6.51075	91.1863	3.28006e-11	1.17394e-10
LOC103307866	21.2946	-6.51049	91.17	3.69163e-13	1.50384e-12
LOC100166048	10.7929	-6.50846	91.0418	4.4607e-11	1.58304e-10
LOC100160748	10.7968	-6.50596	90.8846	5.44953e-09	1.64194e-08
LOC100574484	38.3758	-6.50585	90.8774	1.26523e-08	3.68983e-08
LOC100164181	274.93	-6.50452	90.794	2.39681e-13	9.88671e-13
LOC103308064	10.7593	-6.50215	90.6447	8.4931e-12	3.15915e-11
LOC100163382	10.7672	-6.50161	90.6104	1.69002e-07	4.47973e-07
LOC100575835	21.132	-6.50132	90.5923	7.62158e-14	3.25312e-13
LOC100568938	139.88	-6.49661	90.297	4.19869e-16	2.10937e-15
LOC100569955	508.686	-6.49406	90.1381	2.15461e-46	5.03466e-45
LOC100575119	87.6207	-6.48787	89.7518	3.5235e-18	2.02339e-17
LOC100164904	75.6205	-6.48785	89.7508	1.40223e-14	6.29511e-14
LOC100166259	66.8713	-6.48669	89.6784	8.4415e-21	5.62939e-20
LOC100159515	93.0877	-6.48634	89.6567	1.84075e-28	1.9348e-27
LOC100571800	117.742	-6.48349	89.4799	3.422e-14	1.49494e-13
LOC103308437	10.6329	-6.48081	89.3135	7.46844e-12	2.78857e-11
LOC100574074	10.5675	-6.47353	88.864	3.88254e-11	1.38142e-10
LOC100167844	2412.66	-6.47222	88.7834	1.22946e-07	3.30263e-07
LOC100165583	19251.4	-6.46855	88.5581	8.05818e-22	5.72733e-21
LOC100575803	37.5874	-6.46612	88.4091	7.00149e-11	2.451e-10
LOC100163313	269.382	-6.46029	88.0525	4.88896e-11	1.72937e-10
LOC100569381	39.4325	-6.45963	88.012	2.04169e-14	9.08873e-14
LOC100574293	37.7381	-6.45718	87.8627	3.26629e-13	1.33664e-12
LOC100574854	10.4282	-6.45579	87.7779	0.0183195	0.0285769
LOC100162954	12604.4	-6.45479	87.7171	1.28313e-100	1.08504e-98
LOC100571253	55.8799	-6.45445	87.6967	4.83929e-15	2.24936e-14
LOC100165018	1886.36	-6.45435	87.6908	1.71197e-65	7.20878e-64
LOC103309641	10.388	-6.45037	87.4493	1.19163e-05	2.67773e-05
LOC100570466	28.6332	-6.44456	87.0977	6.21358e-12	2.33142e-11
LOC100572547	10.3494	-6.44367	87.0438	4.10203e-08	1.14498e-07
LOC100161348	17259.7	-6.44271	86.9857	7.44845e-121	9.78878e-119
LOC100575051	10.3221	-6.44242	86.9685	4.51533e-12	1.71039e-11
LOC100162539	11681.4	-6.43292	86.3978	6.83914e-257	3.71347e-254
LOC100573994	10.2238	-6.43174	86.327	6.89273e-12	2.58062e-11
LOC100568546	28.0019	-6.4295	86.1929	1.23497e-12	4.83974e-12
LOC100163617	8833.69	-6.4291	86.1693	2.58258e-48	6.47465e-47
LOC100162252	5568.26	-6.42655	86.0172	9.40787e-94	7.16283e-92
LOC100165751	28822.1	-6.42437	85.8872	7.42459e-76	3.92799e-74
LOC100163371	400.822	-6.42378	85.852	2.49112e-23	1.94326e-22
LOC100163958	1065.96	-6.42011	85.6336	1.91604e-09	5.97999e-09
LOC100573511	1103.9	-6.41578	85.377	1.34465e-17	7.42419e-17
LOC100158867	7791.36	-6.41545	85.3579	2.95429e-35	4.23599e-34
LOC103308065	158.641	-6.4147	85.3132	9.45862e-08	2.56384e-07
LOC100159499	35.7135	-6.41366	85.2516	4.4981e-15	2.09644e-14
LOC100570968	269.662	-6.39786	84.3235	6.2331e-16	3.09078e-15
LOC100569632	19.728	-6.3974	84.2962	1.21399e-12	4.76113e-12
LOC100569481	9.97062	-6.3933	84.0571	1.55363e-10	5.30905e-10
LOC100570360	9.95159	-6.38862	83.7849	1.74239e-11	6.35509e-11
cp16	18383.5	-6.38844	83.7747	1.03854e-32	1.33473e-31
LOC100574014	9.91609	-6.38464	83.5544	2.40447e-09	7.45253e-09
LOC103310318	55.3913	-6.38418	83.5278	1.51692e-16	7.87388e-16
LOC100168549	11266.3	-6.38263	83.438	3.43071e-22	2.49071e-21
LOC100159968	56635.8	-6.37079	82.7561	1.31958e-141	2.2689e-139
LOC100569506	36.9839	-6.36934	82.6725	6.59769e-09	1.97347e-08
LOC100164289	9.82233	-6.3689	82.6473	0.0228103	0.0350286
LOC103308569	336.986	-6.36774	82.5812	5.28311e-25	4.56285e-24
LOC100161716	9.81207	-6.367	82.5386	1.84195e-09	5.75919e-09
LOC100162447	109.153	-6.3654	82.4475	3.18463e-16	1.61804e-15
LOC100569014	9.7709	-6.36515	82.433	1.12641e-10	3.88518e-10
LOC100572872	9.78397	-6.36479	82.4122	7.03828e-12	2.63368e-11
LOC100568775	9.74376	-6.36017	82.1489	4.87443e-11	1.72482e-10
LOC103308741	9.68717	-6.35337	81.7627	2.47937e-11	8.94662e-11
LOC100166854	323.25	-6.35329	81.7583	3.42242e-38	5.56022e-37
LOC100576033	9.61117	-6.33571	80.7682	4.04264e-10	1.33139e-09
LOC100573297	137.734	-6.32893	80.389	3.39053e-23	2.627e-22
LOC100574272	798.208	-6.32595	80.2233	1.2799e-62	4.96394e-61
LOC100167306	5869.78	-6.32408	80.1192	8.03018e-73	3.9638e-71
LOC100570375	217.108	-6.32259	80.0369	9.27388e-23	6.98605e-22
LOC100574966	9.49439	-6.32258	80.0362	3.39853e-10	1.12954e-09
LOC103308673	126.707	-6.32131	79.9657	3.30688e-13	1.35271e-12
LOC100570580	9.46397	-6.31941	79.8607	4.0297e-12	1.53206e-11
LOC100568950	9.47617	-6.31909	79.8429	1.5936e-05	3.5428e-05
LOC103310620	45.2146	-6.319	79.838	6.81584e-17	3.61241e-16
LOC100160593	1134.84	-6.31876	79.8247	5.00212e-24	4.07456e-23
LOC100165308	120.461	-6.31539	79.6384	5.69202e-05	0.00011956
LOC100575680	9.41166	-6.30981	79.331	6.18673e-11	2.17019e-10
LOC100571727	9.38253	-6.30617	79.1309	1.90829e-11	6.94301e-11
LOC100165503	297.784	-6.30597	79.1201	1.75316e-24	1.47164e-23
LOC100167322	196.886	-6.30417	79.0215	2.59903e-19	1.58375e-18
LOC100163050	219.721	-6.30386	79.0041	8.3253e-75	4.25188e-73
LOC100160832	596.953	-6.29864	78.7189	7.81468e-74	3.94231e-72
LOC100165598	201.901	-6.29703	78.6314	5.24585e-17	2.80626e-16
LOC100168652	938.341	-6.29531	78.5376	2.50901e-10	8.42585e-10
LOC100169243	71896.7	-6.29166	78.3391	9.50073e-84	5.83418e-82
LOC100163292	9.30101	-6.29072	78.2881	0.021488	0.0331584
LOC100574589	9.24132	-6.28316	77.8789	6.4805e-11	2.27131e-10
LOC100144773	20181.7	-6.27884	77.6463	1.17311e-25	1.04421e-24
LOC100572736	9.21347	-6.27845	77.6248	1.2736e-07	3.41719e-07
LOC100569976	9.18515	-6.27661	77.5262	1.51772e-12	5.91519e-12
LOC100571993	1320.69	-6.27498	77.4386	2.05786e-07	5.4165e-07
LOC100164918	9.15055	-6.27202	77.2797	1.7285e-10	5.88227e-10
LOC100162839	9.14345	-6.26626	76.9718	3.25417e-11	1.16507e-10
LOC100158704	42.8482	-6.26547	76.9298	7.89832e-06	1.80752e-05
LOC100572105	33.5251	-6.26319	76.808	3.29535e-13	1.34826e-12
LOC103310538	9.08489	-6.25871	76.5701	3.94278e-09	1.20129e-08
LOC100161410	404.617	-6.25641	76.4479	1.08585e-19	6.78921e-19
LOC103307814	71.7723	-6.25395	76.3178	1.52397e-26	1.42798e-25
LOC100162857	282.019	-6.25264	76.2486	1.26213e-12	4.94239e-12
cp73	9.01026	-6.24494	75.8427	0.00481938	0.00813934
LOC103310334	24.7946	-6.24156	75.6652	2.882e-13	1.18313e-12
Obp9	230.739	-6.23869	75.5148	1.818e-15	8.71735e-15
LOC100575108	154.932	-6.23629	75.3894	8.71998e-07	2.17215e-06
LOC100571478	8.90609	-6.23091	75.1086	3.25759e-09	9.99167e-09
LOC100575043	17.4836	-6.22419	74.7596	1.41524e-12	5.52416e-12
LOC100167418	148.814	-6.21872	74.477	1.66445e-12	6.47731e-12
LOC100569565	956.905	-6.21655	74.3649	4.79487e-08	1.33099e-07
LOC100167119	8.79733	-6.21204	74.1326	3.55775e-09	1.08832e-08
LOC100575820	8.76022	-6.20603	73.8246	2.93705e-09	9.04885e-09
LOC103309162	8.74755	-6.20572	73.8087	3.82048e-11	1.36004e-10
LOC100162370	1647.23	-6.20036	73.5352	1.68565e-150	3.13333e-148
LOC100166859	302.317	-6.19855	73.443	1.10287e-17	6.12528e-17
LOC100164734	335.669	-6.19851	73.4408	5.30055e-23	4.05962e-22
LOC100167390	17.2559	-6.19805	73.4176	1.80714e-12	7.01538e-12
LOC103310265	8.69605	-6.19418	73.2209	1.76522e-05	3.90959e-05
LOC100166467	32.6698	-6.19387	73.2051	9.84598e-15	4.4757e-14
LOC103310310	294.438	-6.19176	73.0982	6.48189e-25	5.57486e-24
LOC100168787	17.0743	-6.19066	73.0423	8.79037e-12	3.26561e-11
LOC100167910	68.7649	-6.18997	73.0072	3.55418e-10	1.17767e-09
LOC100570186	23.9637	-6.18546	72.7796	6.74382e-12	2.52532e-11
LOC100167178	391.541	-6.18031	72.5199	1.04733e-108	1.04394e-106
LOC103308564	53.6974	-6.1776	72.3839	9.2315e-14	3.91599e-13
LOC100571170	1063.97	-6.17722	72.3649	9.05736e-11	3.14349e-10
LOC100570337	75.0098	-6.17623	72.3151	4.37255e-23	3.36511e-22
LOC103309172	8.58775	-6.17598	72.3028	7.67345e-10	2.4754e-09
LOC100162649	121.183	-6.17497	72.2523	2.69123e-16	1.3731e-15
LOC100165198	181.096	-6.17307	72.1573	6.64928e-09	1.98804e-08
LOC100168822	169405	-6.17242	72.1247	2.11522e-22	1.56148e-21
LOC103308816	8.56568	-6.17239	72.123	1.72751e-11	6.30415e-11
LOC100576019	30.4578	-6.1673	71.869	2.20647e-15	1.05068e-14
LOC100571992	273.778	-6.16681	71.8447	1.82123e-08	5.23947e-08
LOC100570211	8.5486	-6.16599	71.8038	2.71801e-11	9.7889e-11
LOC100570569	303.844	-6.16551	71.7801	2.07271e-11	7.52396e-11
LOC100575640	38.3889	-6.16231	71.6211	6.49799e-17	3.44927e-16
LOC103308332	16.8226	-6.16162	71.5866	2.42555e-10	8.1562e-10
LOC103309588	6994	-6.16142	71.5766	4.85681e-92	3.59178e-90
LOC103312029	8.49383	-6.16089	71.5506	4.33663e-08	1.20851e-07
LOC100167950	101.753	-6.16057	71.5346	6.33908e-26	5.74163e-25
LOC100160169	114.566	-6.15678	71.3467	1.9398e-13	8.04179e-13
LOC103308600	8.45363	-6.1556	71.2886	1.25047e-08	3.64908e-08
LOC103308273	11.8248	-6.15002	71.0135	4.81025e-12	1.81743e-11
LOC100158927	8.43582	-6.14904	70.9653	1.2857e-08	3.74792e-08
LOC100166851	283.854	-6.14423	70.7289	1.26581e-05	2.83732e-05
LOC100169373	457.831	-6.1426	70.6492	1.0582e-19	6.62638e-19
LOC100159323	45.2484	-6.14236	70.6372	5.59018e-16	2.78335e-15
LOC103310954	72.503	-6.14177	70.6085	7.49223e-10	2.4211e-09
LOC103310518	190.736	-6.13823	70.4357	6.57362e-16	3.25494e-15
LOC103310606	1407	-6.13821	70.4346	1.31803e-38	2.18258e-37
LOC100165066	9962.65	-6.13714	70.3825	2.65507e-88	1.84451e-86
LOC100568674	103.918	-6.13697	70.3739	3.75551e-39	6.40922e-38
LOC100159478	1478.58	-6.13676	70.3639	8.08077e-27	7.7083e-26
LOC100159160	1676.16	-6.13409	70.2334	1.78004e-60	6.54679e-59
LOC100574721	292.725	-6.12555	69.8191	1.04429e-08	3.0711e-08
LOC100163525	95.0901	-6.12283	69.6874	9.42045e-15	4.28794e-14
LOC100569162	61.3742	-6.11955	69.5294	8.39903e-27	7.98604e-26
LOC100571596	144.488	-6.11738	69.4247	7.30107e-49	1.876e-47
LOC100165915	29.8179	-6.11602	69.3593	1.65821e-14	7.41041e-14
LOC103309467	8.20502	-6.11	69.0708	6.01215e-11	2.11219e-10
LOC100572184	16.1889	-6.10984	69.0631	1.5764e-10	5.38151e-10
LOC100165137	5418.07	-6.10905	69.0252	3.77472e-09	1.15179e-08
LOC100570553	1240.12	-6.10725	68.9389	1.8411e-45	4.15163e-44
gpb5	106.319	-6.10593	68.876	4.52636e-15	2.10866e-14
LOC100571375	16.141	-6.10496	68.83	8.8058e-12	3.27016e-11
LOC100165074	105511	-6.10203	68.69	1.85031e-103	1.71199e-101
LOC100159109	491.658	-6.10052	68.6182	3.08136e-72	1.50658e-70
LOC100572081	58.6385	-6.09814	68.5049	9.5757e-09	2.82331e-08
Catb-84	3404.69	-6.09448	68.3316	8.73812e-63	3.41465e-61
LOC100569278	129.007	-6.09363	68.2914	2.69536e-23	2.09941e-22
LOC100571332	8.10119	-6.09119	68.1759	8.80697e-11	3.06019e-10
LOC100571753	226.334	-6.07709	67.5128	2.49024e-26	2.30823e-25
LOC100570152	42.9092	-6.0762	67.4714	3.21849e-10	1.07212e-09
LOC100166174	298.215	-6.07588	67.4564	0.000118546	0.000241361
LOC100158947	1279.29	-6.07533	67.4304	1.67271e-48	4.22437e-47
LOC100168946	500.781	-6.07442	67.3881	3.42609e-13	1.39926e-12
LOC100168034	7.98031	-6.06923	67.1461	3.93943e-09	1.20045e-08
LOC100169075	193.745	-6.06792	67.0852	1.1533e-09	3.66601e-09
LOC103308203	11.2272	-6.0661	67.0005	0.0118907	0.019069
LOC100161804	89.408	-6.06482	66.9412	2.34176e-22	1.72255e-21
LOC103309294	7.93102	-6.06363	66.8858	1.08978e-10	3.76324e-10
LOC103310547	7.95242	-6.0628	66.8474	3.58267e-11	1.27891e-10
LOC100167797	661.451	-6.06239	66.8283	1.90927e-99	1.56948e-97
Eth	2216.74	-6.05939	66.6894	3.0439e-60	1.11356e-58
LOC100167736	189183	-6.05651	66.5567	1.33725e-124	1.88983e-122
LOC100159612	48087.9	-6.05645	66.5537	3.13714e-88	2.16483e-86
LOC100160065	3120.16	-6.05439	66.4589	3.44708e-46	8.00041e-45
LOC100168794	130.043	-6.05345	66.4156	7.35036e-07	1.84277e-06
LOC100573114	35.71	-6.0531	66.3993	8.20341e-15	3.74803e-14
Mlc1	66485.2	-6.05115	66.3099	3.60477e-103	3.32041e-101
LOC103311627	69.9358	-6.05103	66.3042	7.58999e-25	6.5035e-24
LOC100168923	206.35	-6.04614	66.0801	2.94894e-14	1.29486e-13
LOC103310502	7.82223	-6.04108	65.8487	4.06722e-05	8.6711e-05
LOC100166094	894.093	-6.03588	65.6118	8.00791e-19	4.74654e-18
LOC100167885	559.007	-6.03546	65.5926	6.25593e-33	8.15405e-32
LOC100160201	7.77194	-6.0332	65.4898	0.000642698	0.00120971
LOC100158898	7.75034	-6.03229	65.4488	1.44096e-10	4.93631e-10
LOC100575510	7.77134	-6.03108	65.3935	3.1264e-11	1.12088e-10
LOC100164905	31170.8	-6.02971	65.3319	1.33128e-121	1.77214e-119
LOC100163324	8239.35	-6.02376	65.0627	8.82837e-32	1.0888e-30
LOC100574362	7.7184	-6.02164	64.9671	0.0278532	0.0421424
LOC100166253	7.67117	-6.01405	64.6261	1.13195e-07	3.05021e-07
LOC103309694	7.6459	-6.01066	64.4745	5.73977e-11	2.01993e-10
LOC100570183	66.9588	-6.00792	64.3525	2.07352e-25	1.8221e-24
LOC100167629	46.6876	-6.00673	64.2991	4.27229e-12	1.6213e-11
LOC100573600	21.0524	-6.00521	64.2316	3.83902e-12	1.46226e-11
LOC103310611	7.62492	-6.00494	64.2194	1.53469e-10	5.24694e-10
LOC100166159	259.79	-6.00488	64.2168	7.92654e-16	3.89865e-15
LOC100161354	185.388	-5.99971	63.9872	5.2737e-36	7.75016e-35
LOC100166245	7.58085	-5.99675	63.856	1.33513e-05	2.98718e-05
LOC100169195	374.998	-5.9954	63.7964	7.72165e-32	9.56536e-31
LOC100572843	170.126	-5.99233	63.6605	1.9096e-07	5.03718e-07
LOC103310663	563.398	-5.99052	63.5809	6.85351e-29	7.33446e-28
LOC100159604	112.27	-5.98903	63.5154	4.59611e-12	1.73939e-11
LOC100571628	7.53772	-5.98823	63.48	1.35233e-05	3.02468e-05
LOC100165261	2113.59	-5.98568	63.3678	6.65551e-117	8.17399e-115
LOC103307896	320.71	-5.9837	63.2809	5.65637e-27	5.45364e-26
LOC100168428	190.722	-5.96739	62.5696	5.19519e-17	2.77988e-16
cp52	171.9	-5.96527	62.4777	5.20334e-08	1.44089e-07
LOC100573257	7.39071	-5.96442	62.4411	7.28525e-11	2.54601e-10
LOC100574731	7.39061	-5.96002	62.2506	5.56838e-05	0.000117094
LOC100167975	266.737	-5.95765	62.1487	8.41346e-23	6.34949e-22
LOC100165084	7.38195	-5.95724	62.1309	1.87321e-09	5.8525e-09
LOC100575435	340.825	-5.9566	62.1034	8.75456e-11	3.04352e-10
LOC100161568	8436.12	-5.95595	62.0754	2.63284e-13	1.083e-12
LOC100569403	146.935	-5.9553	62.0475	1.64982e-14	7.37772e-14
LOC100167648	213.466	-5.95133	61.8768	2.58066e-14	1.13824e-13
LOC100570627	58.336	-5.94729	61.7041	3.031e-22	2.21141e-21
LOC100160863	86.7305	-5.94479	61.5969	3.18044e-14	1.39295e-13
LOC100164049	11897.6	-5.94191	61.4744	4.72841e-36	6.96369e-35
LOC100164898	628.926	-5.94004	61.3947	4.54056e-56	1.46613e-54
LOC100164030	46.0748	-5.93717	61.2727	6.23223e-20	3.94931e-19
LOC100159926	92.4679	-5.93646	61.2426	2.33683e-18	1.35058e-17
LOC100302479	331.54	-5.93243	61.0718	4.56765e-11	1.6196e-10
LOC100166814	1729.49	-5.92893	60.9237	9.97784e-74	5.00907e-72
LOC100166184	1008.17	-5.92804	60.886	2.5951e-05	5.64937e-05
LOC100570077	741.9	-5.92731	60.8554	3.80863e-109	3.85213e-107
LOC100162620	112275	-5.92214	60.6377	9.40357e-113	1.06024e-110
LOC100167365	20339.5	-5.92207	60.6348	2.2243e-113	2.56392e-111
LOC100569339	18.7676	-5.91542	60.3556	3.60194e-07	9.27827e-07
LOC100569203	90.038	-5.91429	60.3086	8.58611e-17	4.51701e-16
LOC100573813	936.27	-5.91427	60.3078	1.06151e-37	1.69259e-36
LOC100166872	7.16134	-5.91323	60.2641	4.9368e-05	0.000104355
LOC103309505	7.15845	-5.91253	60.2351	0.00314146	0.00544915
LOC100574257	44.819	-5.91027	60.1408	1.04322e-13	4.41535e-13
LOC100164378	44.1011	-5.90161	59.7808	3.5167e-16	1.778e-15
LOC103310120	7.0851	-5.90018	59.7217	4.76889e-05	0.000100961
LOC100165921	16094.2	-5.89797	59.63	7.72641e-106	7.48446e-104
LOC100163506	7055.87	-5.88533	59.11	5.70732e-27	5.50019e-26
LOC100168485	274.705	-5.88406	59.0582	8.02907e-39	1.34686e-37
LOC100569445	7.00461	-5.88387	59.0502	1.1801e-07	3.17459e-07
LOC100159519	1898.72	-5.88311	59.0191	9.15705e-112	9.84049e-110
LOC100163370	1666.38	-5.87773	58.7993	4.52399e-22	3.25352e-21
LOC100574271	6.98118	-5.87742	58.787	3.41266e-05	7.33778e-05
LOC100160906	2726.7	-5.87598	58.7282	1.27656e-46	2.99651e-45
cp15	343.191	-5.87543	58.7059	5.41286e-15	2.50412e-14
LOC100570270	37.7289	-5.87438	58.6631	1.39257e-15	6.74005e-15
LOC100576058	169.642	-5.87374	58.6372	1.82629e-13	7.57576e-13
LOC100163900	1270.68	-5.87255	58.5889	2.18363e-99	1.78789e-97
Catb-16a	23315.3	-5.87093	58.5229	4.64339e-71	2.20246e-69
LOC100164538	153827	-5.86722	58.3728	2.32599e-102	2.09573e-100
LOC100164950	6.88256	-5.85944	58.0588	4.31767e-08	1.20371e-07
LOC100169435	38.1123	-5.85604	57.9222	1.26282e-11	4.6445e-11
LOC103308438	6.88887	-5.85087	57.715	1.11073e-10	3.83303e-10
LOC100166816	18.6862	-5.85043	57.6971	4.79921e-12	1.81359e-11
LOC100159732	79.8621	-5.84391	57.4369	1.5115e-36	2.28141e-35
LOC100167590	6.81553	-5.84251	57.3814	0.00335677	0.00579632
ACYPI38480	1824.18	-5.83938	57.2569	8.1504e-52	2.31635e-50
LOC100165278	915.9	-5.83717	57.1694	1.86276e-35	2.68772e-34
LOC100165009	290.034	-5.83565	57.109	3.47059e-17	1.87605e-16
LOC103308543	6.7883	-5.83366	57.0303	4.8522e-09	1.46736e-08
LOC100169218	54.4635	-5.8309	56.9216	5.49793e-15	2.54176e-14
LOC100160895	1129.36	-5.83052	56.9065	8.63959e-52	2.452e-50
LOC100161743	65.498	-5.82989	56.8815	6.06141e-09	1.81913e-08
LOC103309992	6.73627	-5.82775	56.7971	4.56048e-11	1.61733e-10
LOC100575348	6.74095	-5.82684	56.7615	5.09262e-05	0.000107495
LOC100569515	8572.28	-5.8253	56.7008	1.52647e-40	2.76279e-39
LOC100164751	6.71226	-5.82433	56.6629	6.59037e-09	1.97185e-08
LOC100161576	73.9183	-5.82241	56.5873	8.23958e-07	2.0577e-06
LOC100575801	91.8541	-5.82131	56.5442	3.91578e-14	1.70488e-13
LOC100570898	18.4598	-5.81933	56.4667	2.42932e-07	6.35851e-07
LOC100164681	287.035	-5.81849	56.4341	2.14067e-39	3.6807e-38
LOC100571859	285.359	-5.8183	56.4266	2.51686e-42	4.93634e-41
LOC100575455	17.1358	-5.81529	56.3087	0.000193292	0.000385333
LOC100574511	1176.79	-5.81462	56.2825	2.78664e-44	5.93362e-43
LOC100160655	9.42751	-5.81305	56.2214	3.48003e-08	9.76785e-08
LOC100163202	128.716	-5.81289	56.2152	2.24126e-10	7.56485e-10
LOC100167486	17.0628	-5.81063	56.1273	0.000302015	0.000588987
LOC103308540	6.6746	-5.80926	56.0741	5.91605e-11	2.07984e-10
LOC100163053	2168.36	-5.80743	56.0029	5.6033e-52	1.59686e-50
LOC100168286	1348.8	-5.80728	55.9969	4.49088e-24	3.67263e-23
LOC100159943	205.953	-5.80698	55.9853	9.5673e-49	2.44008e-47
LOC100570965	6.62481	-5.80566	55.9343	1.70182e-08	4.90689e-08
LOC100160678	367.254	-5.80565	55.9338	1.77753e-16	9.17899e-16
LOC100159828	4026.41	-5.80359	55.8539	1.0391e-05	2.34906e-05
LOC100570900	24.4815	-5.80197	55.7913	1.1729e-12	4.60521e-12
LOC100163798	276.076	-5.80098	55.7531	2.7734e-40	4.96732e-39
LOC100574117	95.2659	-5.80093	55.7512	4.92292e-11	1.74108e-10
LOC100572561	35.4465	-5.79005	55.3325	1.98259e-11	7.20823e-11
LOC100163133	250.7	-5.78951	55.3116	1.34926e-59	4.8416e-58
LOC100161673	3352.07	-5.78632	55.1895	5.04188e-52	1.44485e-50
LOC100164576	66.0155	-5.77753	54.8541	1.41067e-08	4.09601e-08
LOC100160620	1192.08	-5.77548	54.7764	1.31821e-28	1.39266e-27
LOC100576046	64.0958	-5.77482	54.7512	2.75775e-18	1.58985e-17
LOC100162790	2576.25	-5.77178	54.6362	4.13064e-51	1.13637e-49
LOC100158766	9780.23	-5.77015	54.5743	1.43899e-14	6.45591e-14
LOC100575196	6.48219	-5.76954	54.5512	1.90239e-08	5.46076e-08
LOC100570752	6.46544	-5.76921	54.5389	7.05099e-08	1.93179e-07
LOC100165071	52.4739	-5.76783	54.4867	3.46387e-21	2.36343e-20
LOC100162171	888.579	-5.76446	54.3595	1.64405e-50	4.46339e-49
LOC100573165	27.6159	-5.76298	54.3037	5.17945e-11	1.82898e-10
LOC103311075	9.10478	-5.76183	54.2606	1.42538e-10	4.88456e-10
LOC103308933	6.4208	-5.76094	54.227	6.38958e-09	1.91567e-08
LOC100575157	23.1726	-5.75538	54.0184	2.00597e-10	6.79515e-10
LOC100570826	123.419	-5.75283	53.9232	4.55096e-09	1.38047e-08
LOC100163995	99.0238	-5.74748	53.7234	1.18137e-31	1.44317e-30
LOC100163311	604.926	-5.74337	53.5707	2.20899e-14	9.80597e-14
LOC100163392	6.35025	-5.74288	53.5526	8.4798e-09	2.5106e-08
LOC100164982	7017.56	-5.73924	53.4175	8.69186e-70	4.01206e-68
LOC100576010	12.6111	-5.73822	53.3798	2.27234e-10	7.66474e-10
LOC100159063	13871.7	-5.73774	53.3618	2.90126e-41	5.46183e-40
LOC100158673	672.683	-5.73012	53.081	2.53036e-44	5.40415e-43
LOC100570242	56.4016	-5.72762	52.9891	3.1425e-15	1.48102e-14
LOC100167813	99.4494	-5.7271	52.9697	4.55889e-10	1.49616e-09
LOC100162115	6.28439	-5.72668	52.9544	2.41846e-05	5.28434e-05
LOC100159973	6.27761	-5.72544	52.9089	5.02437e-05	0.00010613
LOC100572096	28.3646	-5.72442	52.8716	2.80405e-12	1.07659e-11
LOC100162516	12.373	-5.72308	52.8227	4.13638e-09	1.25842e-08
LOC100575376	17.5403	-5.72305	52.8213	5.04215e-09	1.52276e-08
cp14	239.238	-5.71953	52.6927	1.42749e-09	4.49944e-09
LOC100572565	353.926	-5.71861	52.659	5.36403e-21	3.61923e-20
LOC100167028	2673.46	-5.71809	52.6401	2.54101e-37	3.96586e-36
LOC100167420	294.432	-5.71693	52.5979	1.68405e-18	9.79616e-18
LOC103308338	65.8905	-5.71668	52.5888	6.52836e-08	1.79289e-07
LOC100569634	141.706	-5.71441	52.506	1.28487e-07	3.44608e-07
LOC100572104	92.3824	-5.71283	52.4485	3.68066e-24	3.02683e-23
LOC100569094	6.23172	-5.71169	52.407	3.39465e-07	8.76728e-07
LOC100166378	175.616	-5.70641	52.2155	7.53357e-22	5.36001e-21
LOC100569340	17.045	-5.70224	52.0648	1.5284e-07	4.07172e-07
LOC103310200	6.19497	-5.70184	52.0505	3.79599e-09	1.15776e-08
LOC100166569	201.476	-5.69963	51.9708	0.000194769	0.000388015
LOC100569954	3262.41	-5.69734	51.8886	6.40943e-09	1.92106e-08
LOC100570464	6.13663	-5.69669	51.8651	1.12429e-08	3.29555e-08
LOC100167045	292.877	-5.69601	51.8408	4.86577e-16	2.43206e-15
LOC100167415	33.9763	-5.69423	51.7767	3.33814e-13	1.36415e-12
LOC100161081	7798.83	-5.69275	51.7236	1.04969e-13	4.43907e-13
LOC100575827	178.931	-5.69162	51.683	1.30228e-37	2.06533e-36
LOC103310721	6.13475	-5.6908	51.6538	4.56698e-05	9.68355e-05
LOC100163126	4215.6	-5.68933	51.6012	3.33177e-13	1.36181e-12
LOC100573035	2673.98	-5.68842	51.5684	5.4389e-46	1.25107e-44
LOC100169332	3293.49	-5.68809	51.5567	9.25771e-19	5.46849e-18
LOC100161660	1757.75	-5.68758	51.5386	1.73515e-34	2.41108e-33
Catb-5880	1241.37	-5.68562	51.4687	8.54505e-53	2.50797e-51
LOC100575094	6.116	-5.68562	51.4684	0.00126617	0.002305
LOC100575654	16.8161	-5.6852	51.4535	1.23735e-10	4.25505e-10
LOC100160337	183.271	-5.68459	51.4319	2.97601e-26	2.75107e-25
LOC100160412	20726	-5.6821	51.3432	5.97442e-106	5.81463e-104
LOC100572839	22.4094	-5.67921	51.2402	8.35553e-09	2.47487e-08
LOC100164501	2690.19	-5.67793	51.1949	1.7717e-15	8.50327e-15
LOC100575145	2291.38	-5.67597	51.1253	4.05195e-48	1.00244e-46
LOC100569707	52.1299	-5.67434	51.0678	2.2262e-07	5.84095e-07
LOC100160582	572.068	-5.67267	51.0085	5.61991e-53	1.65888e-51
LOC100574479	57.9748	-5.67254	51.0041	1.19611e-15	5.81237e-15
LOC100569880	163.791	-5.67254	51.0041	5.12374e-08	1.41922e-07
LOC100160404	1724.66	-5.67219	50.9917	1.38236e-13	5.79013e-13
LOC100169622	977.038	-5.67216	50.9907	3.57195e-21	2.43475e-20
LOC100166709	6.05585	-5.67191	50.9819	5.48977e-05	0.000115523
LOC103309092	12.0425	-5.67137	50.9626	1.48221e-10	5.07425e-10
LOC100572017	6.03747	-5.67088	50.9456	5.63916e-09	1.69635e-08
LOC103308725	36.0732	-5.6708	50.9426	1.58415e-13	6.59784e-13
LOC103308928	6.04749	-5.66987	50.9098	8.48059e-05	0.000175138
LOC100164469	163.085	-5.66902	50.8796	1.60626e-07	4.26703e-07
LOC100574681	6.03	-5.6663	50.7841	0.00413435	0.00705633
LOC100576044	168.727	-5.66337	50.681	1.10451e-27	1.1133e-26
LOC100163955	6.02237	-5.6631	50.6712	5.49559e-05	0.000115629
LOC100572065	6.0136	-5.66161	50.6191	1.24623e-08	3.63749e-08
LOC100164836	290.325	-5.65918	50.5339	2.381e-09	7.38311e-09
LOC100575914	57.1408	-5.65874	50.5186	1.37276e-18	8.02613e-18
LOC100160775	136.147	-5.658	50.4926	2.96989e-39	5.07687e-38
LOC100165396	3322.28	-5.65712	50.4618	1.13168e-13	4.77405e-13
LOC100572304	53.5091	-5.65705	50.4594	6.42643e-15	2.95776e-14
LOC100162947	16.4936	-5.65683	50.4516	1.18144e-10	4.06955e-10
LOC100165373	5.98018	-5.65552	50.4057	1.00531e-06	2.49279e-06
LOC103309967	27.3345	-5.65254	50.3019	0.00354652	0.00610354
LOC100160218	1113.05	-5.65214	50.2879	6.30399e-63	2.47282e-61
LOC100573275	84.8612	-5.6521	50.2865	5.65612e-13	2.27269e-12
LOC103309843	85.3144	-5.65131	50.2592	2.40216e-11	8.68015e-11
LOC100163040	142.073	-5.65032	50.2245	1.76983e-11	6.45177e-11
LOC100574112	459.112	-5.64953	50.1969	7.1103e-37	1.08995e-35
LOC100165633	75.2846	-5.64918	50.1849	1.8733e-16	9.65329e-16
LOC100160642	168.653	-5.64727	50.1185	5.88638e-11	2.07043e-10
LOC100572515	5.95125	-5.64566	50.0624	5.62857e-05	0.000118299
LOC100575877	5.92622	-5.64409	50.0082	1.08646e-08	3.18875e-08
LOC100573741	5.92597	-5.64402	50.0057	9.99324e-08	2.70343e-07
LOC100568906	37.3773	-5.63938	49.8452	1.86197e-14	8.29762e-14
LOC100162697	5.88291	-5.63374	49.6505	1.72792e-09	5.41169e-09
LOC100166173	7923.61	-5.63236	49.6032	5.77897e-21	3.89029e-20
LOC100568944	20.7194	-5.63132	49.5673	6.2982e-11	2.20854e-10
LOC100165011	599.885	-5.63102	49.5572	4.53975e-20	2.90356e-19
LOC103310495	5.8832	-5.63059	49.5422	6.03427e-09	1.81125e-08
LOC103310439	8.35095	-5.62972	49.5125	1.10373e-05	2.48805e-05
LOC103310478	5.87726	-5.62902	49.4885	7.12182e-09	2.12562e-08
LOC103310587	5.8419	-5.62594	49.383	1.43421e-08	4.16145e-08
LOC100569843	5.85097	-5.62558	49.3705	1.41861e-08	4.11735e-08
LOC100165446	72.0147	-5.62497	49.3497	1.49317e-13	6.23654e-13
LOC100164529	165.739	-5.62406	49.3188	5.34007e-25	4.60818e-24
LOC100169284	876.008	-5.62302	49.283	3.01743e-13	1.23701e-12
LOC100570880	1113.84	-5.62227	49.2573	1.81497e-81	1.0792e-79
LOC100162169	1230.86	-5.62156	49.2333	3.44025e-38	5.58479e-37
LOC100166571	319.307	-5.62092	49.2115	9.85345e-13	3.88954e-12
LOC100159226	863.605	-5.6208	49.2073	1.74724e-32	2.22262e-31
LOC100302428	43.0572	-5.61419	48.9823	5.53091e-19	3.3126e-18
LOC100169317	22585.5	-5.6073	48.749	3.26415e-26	3.01204e-25
LOC100574786	5.76052	-5.60538	48.6841	4.85231e-09	1.46736e-08
LOC100158963	3803.48	-5.60383	48.6318	1.75753e-57	5.96432e-56
LOC100160151	171.056	-5.6021	48.5734	6.85945e-50	1.82857e-48
LOC100570714	405.34	-5.60073	48.5276	2.30056e-15	1.09397e-14
LOC100160253	409.882	-5.59876	48.4613	7.22126e-12	2.70018e-11
LOC100163961	609.366	-5.59507	48.3376	3.12947e-07	8.11388e-07
LOC100572781	375.23	-5.5915	48.218	1.64737e-36	2.48466e-35
LOC103309173	5.71774	-5.58859	48.1208	3.6898e-08	1.03355e-07
LOC100570637	11.3165	-5.58703	48.069	6.5475e-07	1.64689e-06
LOC100166317	735.729	-5.58693	48.0656	0.000206026	0.000409138
LOC103309887	5.68969	-5.58661	48.0549	2.77443e-08	7.8536e-08
LOC100167476	41.5381	-5.58544	48.0158	1.37732e-23	1.09133e-22
LOC100575291	5.71889	-5.58414	47.9727	1.5447e-09	4.85554e-09
LOC100573743	390.143	-5.58288	47.9309	8.28578e-09	2.45492e-08
LOC100572725	1172.62	-5.57911	47.8056	3.0421e-20	1.96394e-19
LOC100163938	399.64	-5.576	47.7028	9.06019e-26	8.12778e-25
LOC100161517	266.132	-5.56895	47.4701	3.47739e-16	1.76028e-15
LOC100570990	271.673	-5.56548	47.3561	2.84757e-09	8.78235e-09
LOC100164574	1106.33	-5.56268	47.2643	3.41946e-16	1.7318e-15
LOC100165882	172.192	-5.56196	47.2408	3.25512e-22	2.36572e-21
LOC100574229	5.58898	-5.55708	47.0814	2.03062e-07	5.34751e-07
LOC100161147	45.3995	-5.55261	46.9355	1.74846e-25	1.54303e-24
Obp8	158.613	-5.55084	46.878	3.95568e-22	2.86177e-21
LOC100575698	5.55801	-5.54944	46.8327	1.11258e-09	3.5404e-09
LOC103311624	5.55657	-5.54885	46.8133	1.95453e-08	5.60575e-08
LOC100166725	5.56896	-5.54815	46.7906	3.02197e-07	7.84996e-07
LOC100162922	5.53395	-5.54799	46.7855	3.42846e-08	9.62833e-08
LOC100161700	15.4449	-5.54696	46.7521	4.68137e-10	1.53489e-09
LOC100166650	22114.1	-5.54689	46.7498	5.61443e-155	1.08264e-152
LOC100573280	148.799	-5.54631	46.7312	2.68274e-34	3.70998e-33
LOC100164079	105.956	-5.54546	46.7034	6.17225e-10	2.00586e-09
LOC103308858	5.51261	-5.54255	46.6094	6.65317e-09	1.98891e-08
LOC100166950	51986.3	-5.54221	46.5985	1.78453e-49	4.69047e-48
LOC100570753	5.53611	-5.54182	46.586	0.000171762	0.000344174
LOC103310381	58.505	-5.54142	46.5728	2.45647e-15	1.16542e-14
LOC100164783	3292.01	-5.53944	46.5091	2.75992e-27	2.72075e-26
LOC100574300	5.521	-5.53823	46.4701	2.71255e-09	8.37719e-09
LOC100163759	1359.23	-5.53812	46.4665	1.14808e-24	9.7323e-24
LOC100163213	5.52354	-5.53716	46.4356	0.0001046	0.000214002
LOC103312033	5.49818	-5.53363	46.3221	6.64432e-05	0.000138701
LOC100575759	5.49948	-5.53363	46.322	6.39949e-05	0.000133766
LOC100168045	344.636	-5.53305	46.3035	2.20114e-17	1.19895e-16
LOC100168835	207.888	-5.52978	46.1986	4.23621e-10	1.39292e-09
LOC100575850	5.47669	-5.52701	46.1102	8.99361e-05	0.000185306
LOC100570952	179.941	-5.52673	46.1011	1.78007e-39	3.06835e-38
LOC100161457	190.152	-5.52556	46.0639	4.79826e-07	1.2212e-06
LOC100165367	5.45856	-5.5248	46.0396	2.41264e-06	5.7803e-06
LOC100572389	549.129	-5.51912	45.8586	3.38896e-07	8.75589e-07
LOC100573404	5.4224	-5.51128	45.6099	7.01485e-05	0.000146081
Cpap3-d1	4884.8	-5.50404	45.3818	3.3041e-41	6.17514e-40
LOC100573137	5.38876	-5.50332	45.3591	7.38079e-05	0.000153377
LOC100165113	5.3897	-5.50247	45.3324	0.00021175	0.000419978
LOC100570566	92.5271	-5.49687	45.1569	4.92469e-21	3.32933e-20
LOC103310839	15.1479	-5.49123	44.9805	9.12141e-07	2.26886e-06
LOC100168379	220.408	-5.49023	44.9496	0.000329241	0.000639844
LOC100161274	173.403	-5.48946	44.9254	4.80504e-40	8.52471e-39
LOC100569633	112.77	-5.48944	44.9249	1.88082e-07	4.96506e-07
LOC100569567	428.205	-5.48673	44.8405	5.50786e-65	2.26382e-63
LOC100568667	5.31163	-5.48513	44.7909	0.000349324	0.000676644
LOC100162544	142.253	-5.48345	44.7386	3.48366e-12	1.33084e-11
LOC103310419	5.31384	-5.48289	44.7214	0.00625469	0.0104109
LOC100162810	282.423	-5.47852	44.586	6.75953e-40	1.19307e-38
LOC100570881	255.335	-5.47687	44.5351	5.99239e-33	7.82537e-32
AANAT1	5428.42	-5.47513	44.4814	2.64528e-16	1.34999e-15
LOC100160616	84.5581	-5.4746	44.465	2.18227e-07	5.73005e-07
LOC103309168	19.2187	-5.47367	44.4364	2.72379e-12	1.04714e-11
S1	22748.8	-5.47357	44.4332	5.90745e-46	1.35281e-44
LOC100573544	5.28254	-5.47258	44.4029	0.000597081	0.00112693
LOC100159048	2939.55	-5.46944	44.3063	3.25512e-43	6.61052e-42
LOC100167034	4393.87	-5.46787	44.2582	4.30781e-31	5.09942e-30
LOC100167856	174.694	-5.46547	44.1847	3.13878e-48	7.831e-47
LOC100570400	133.358	-5.46532	44.1801	1.82426e-51	5.10027e-50
LOC100570323	5.21241	-5.46119	44.0538	1.51424e-08	4.38689e-08
LOC100161293	853.634	-5.46107	44.05	3.5606e-08	9.98313e-08
LOC100163651	360.679	-5.4582	43.9626	3.35509e-13	1.3708e-12
LOC100168855	8300.45	-5.44952	43.6986	1.80079e-71	8.58101e-70
LOC103311618	5.17848	-5.44778	43.6461	5.47629e-09	1.64952e-08
LOC100572206	121.782	-5.44719	43.6282	7.49038e-05	0.000155521
LOC103309889	10.3061	-5.44648	43.6068	3.60363e-09	1.10154e-08
LOC100164801	944.324	-5.44313	43.5056	1.90141e-07	5.01686e-07
LOC100160785	5.18484	-5.44296	43.5005	4.2258e-08	1.17873e-07
LOC100162120	37.0289	-5.44262	43.4901	4.23497e-09	1.28708e-08
LOC100570911	5.17549	-5.43935	43.3917	1.42915e-06	3.49298e-06
LOC100572074	40.2668	-5.43699	43.3208	2.60967e-10	8.74821e-10
LOC100165414	39.0209	-5.42615	42.9966	3.35251e-07	8.66713e-07
LOC100161484	85.7424	-5.42444	42.9456	3.25563e-09	9.98713e-09
LOC100163369	14.3645	-5.42402	42.9332	8.99954e-08	2.44294e-07
LOC100162137	18.7435	-5.42288	42.8993	1.4636e-08	4.24375e-08
LOC100572452	147.487	-5.4217	42.8641	1.07334e-27	1.08347e-26
LOC100162791	3293.84	-5.41974	42.8059	0.00117006	0.00213834
LOC100163447	1229.75	-5.41956	42.8007	1.14814e-19	7.16349e-19
LOC100163456	402.379	-5.41568	42.6856	0.000140426	0.000283921
LOC100164442	5.052	-5.41016	42.5225	0.00167816	0.00301091
LOC100568492	5.04731	-5.40987	42.5143	1.58902e-07	4.22285e-07
LOC103310699	5.02174	-5.40294	42.3104	1.29459e-06	3.17388e-06
LOC103309491	73.4804	-5.39267	42.0102	4.65869e-15	2.16884e-14
LOC100573395	962.742	-5.39111	41.9647	6.88169e-66	2.90963e-64
LOC100167551	493.843	-5.39082	41.9564	9.69483e-10	3.09937e-09
LOC100570244	4.9638	-5.38719	41.851	3.2776e-08	9.22224e-08
LOC100160366	13.705	-5.38297	41.7289	1.12217e-08	3.28981e-08
LOC100576069	18.2511	-5.37806	41.5868	4.07658e-11	1.44946e-10
LOC100575315	4.91666	-5.37556	41.5149	9.28722e-08	2.51871e-07
LOC100166138	39.5114	-5.37433	41.4796	2.06643e-08	5.91028e-08
LOC100569160	13.6411	-5.37381	41.4646	2.09738e-07	5.51489e-07
LOC103307878	4.9347	-5.37313	41.4452	1.37768e-08	4.00475e-08
LOC100302383	39.4589	-5.37287	41.4378	2.39531e-08	6.81784e-08
LOC100168594	835.156	-5.37045	41.3683	6.13268e-06	1.41792e-05
LOC100162553	504.981	-5.36946	41.3399	3.84429e-15	1.80026e-14
LOC103309255	4.9131	-5.36437	41.1942	2.54978e-08	7.24153e-08
LOC100572384	533.861	-5.36249	41.1405	1.321e-06	3.23515e-06
LOC100575918	318.451	-5.36166	41.117	2.32061e-57	7.83653e-56
LOC100161799	1378.84	-5.36136	41.1082	1.58922e-39	2.75318e-38
LOC100161211	3851.86	-5.35901	41.0415	9.22683e-10	2.95617e-09
LOC100168671	268.959	-5.35865	41.0312	4.12793e-18	2.35802e-17
LOC100574816	4.86892	-5.35812	41.0161	0.00879067	0.0143552
LOC100160936	373.031	-5.35631	40.9649	1.77093e-26	1.65188e-25
LOC100573127	75.0904	-5.35624	40.9627	8.70105e-10	2.79161e-09
LOC100575626	416.105	-5.35607	40.9578	6.31058e-26	5.72335e-25
LOC100159330	180.93	-5.35277	40.8643	3.58816e-07	9.24623e-07
LOC100573778	4.84069	-5.35136	40.8243	2.84904e-08	8.05373e-08
LOC100165393	10124.2	-5.35009	40.7885	3.88848e-30	4.3675e-29
LOC100164771	1067.38	-5.34958	40.7741	1.72189e-13	7.15419e-13
LOC100165619	3920.29	-5.34685	40.6969	3.01075e-37	4.68483e-36
LOC100571525	23.0225	-5.34675	40.6941	3.77067e-08	1.05535e-07
LOC100574458	1664.18	-5.34519	40.6502	4.10742e-66	1.74739e-64
LOC100167740	518.15	-5.34437	40.6272	3.53169e-60	1.28745e-58
LOC100159812	50.4837	-5.34402	40.6173	2.33153e-16	1.194e-15
LOC100571912	4.80531	-5.33832	40.457	2.21875e-07	5.82214e-07
LOC100574284	119.301	-5.33606	40.3939	4.40845e-11	1.56557e-10
cp53	228.053	-5.33514	40.3679	5.80925e-12	2.18368e-11
LOC100169516	415.846	-5.33358	40.3243	3.54415e-16	1.79144e-15
LOC100534631	127.011	-5.33221	40.286	2.26533e-12	8.7382e-12
LOC100166606	40854.5	-5.32559	40.1017	1.55985e-30	1.79201e-29
LOC103307635	4.75497	-5.32347	40.0428	0.000221191	0.000437568
LOC100161198	969.617	-5.32195	40.0005	4.05826e-27	3.95158e-26
LOC100568676	92.5693	-5.32123	39.9807	1.56245e-07	4.15545e-07
LOC100568649	90.5119	-5.3208	39.9689	1.4045e-18	8.20706e-18
LOC100569409	4.73545	-5.31971	39.9387	5.54033e-07	1.40228e-06
LOC100159914	2939.35	-5.31959	39.9351	3.66499e-12	1.39855e-11
LOC100168995	2361.96	-5.31936	39.9289	6.27114e-32	7.80884e-31
LOC100164036	153.036	-5.3157	39.8278	9.56629e-12	3.54492e-11
LOC100159180	4.7241	-5.31395	39.7793	0.000119291	0.00024283
LOC100161375	2166.83	-5.3095	39.6568	1.8824e-104	1.78163e-102
Obp4	773.316	-5.30588	39.5575	1.90891e-11	6.94403e-11
LOC100166804	286.877	-5.3053	39.5415	8.19612e-24	6.58018e-23
LOC100574655	136.911	-5.30448	39.5193	1.24971e-16	6.51472e-16
LOC100573742	4.70959	-5.30253	39.4658	1.33e-06	3.25682e-06
LOC100574418	65.8903	-5.30128	39.4316	3.64413e-09	1.11293e-08
LOC100168219	12.966	-5.30086	39.4202	7.09825e-08	1.94422e-07
LOC100162163	13.1744	-5.29993	39.3948	3.1397e-09	9.64869e-09
LOC100161207	1523.33	-5.29984	39.3922	4.60205e-08	1.27919e-07
LOC100160101	150.597	-5.2992	39.3749	5.26753e-23	4.03733e-22
LOC103309425	4.67109	-5.2978	39.3366	1.39211e-06	3.40404e-06
LOC100167148	366.204	-5.29778	39.336	5.94782e-82	3.56748e-80
LOC100159527	7725.51	-5.29767	39.3331	1.94276e-29	2.12314e-28
cp76	694.212	-5.29688	39.3114	9.3654e-35	1.31722e-33
LOC100574424	112.416	-5.2966	39.3038	3.8966e-47	9.34868e-46
LOC100572145	140.517	-5.2927	39.1977	1.95379e-15	9.35111e-15
cp11	4943.5	-5.29142	39.163	3.49261e-08	9.79917e-08
LOC103308251	105.011	-5.28786	39.0666	5.37119e-09	1.61905e-08
LOC100574596	54.1327	-5.28731	39.0515	7.60517e-19	4.51431e-18
Capa	659.322	-5.28722	39.0492	1.46945e-124	2.06253e-122
LOC100568850	40.3103	-5.28711	39.0463	3.74612e-07	9.63642e-07
LOC100165370	421.951	-5.28613	39.0195	2.09895e-10	7.09728e-10
LOC103309217	13.1163	-5.28581	39.0109	2.17596e-07	5.71495e-07
LOC100568740	4.62251	-5.28334	38.9442	0.0108045	0.0174381
LOC100161264	4.60162	-5.27728	38.7811	6.49471e-07	1.63401e-06
LOC100575643	1679.48	-5.27471	38.712	6.56054e-56	2.10847e-54
LOC100161421	4.58991	-5.27452	38.707	1.01787e-05	2.30409e-05
ACYPI46913	208.397	-5.27392	38.6909	6.59035e-19	3.91983e-18
LOC100164534	697.099	-5.27297	38.6652	1.99742e-19	1.22657e-18
LOC103308250	4.59159	-5.27054	38.6003	0.0113846	0.0183143
LOC100570667	12.144	-5.26822	38.5383	1.91727e-06	4.63329e-06
LOC100568675	1422.93	-5.26525	38.459	1.43227e-06	3.50019e-06
LOC100568956	125.67	-5.26298	38.3984	5.17635e-17	2.77124e-16
LOC100575917	959.934	-5.26282	38.3943	1.26357e-68	5.70342e-67
LOC100575164	3181.93	-5.26204	38.3736	4.83636e-22	3.47453e-21
LOC100574021	25.9651	-5.26062	38.3359	3.72608e-10	1.23166e-09
LOC100164401	4.53768	-5.25726	38.2465	0.000449191	0.000860554
Y-y	135.9	-5.25719	38.2448	7.17634e-17	3.7986e-16
LOC100568986	4.53557	-5.25502	38.1872	0.000197157	0.000392393
LOC100575343	193.854	-5.25229	38.1151	8.62806e-55	2.68511e-53
LOC100575369	4.50744	-5.2514	38.0917	3.01408e-08	8.50165e-08
LOC100574441	4.51811	-5.25083	38.0765	0.000787527	0.00146864
LOC100575475	4.51894	-5.24831	38.01	2.87973e-08	8.13605e-08
LOC100569912	12.536	-5.24818	38.0066	5.92247e-10	1.92772e-09
LOC100167357	1071.81	-5.24381	37.8918	2.77269e-07	7.22791e-07
LOC100164841	30.4129	-5.24079	37.8125	4.24835e-06	9.96547e-06
LOC100167687	4882.69	-5.23945	37.7774	5.06052e-06	1.17915e-05
ACYPI37407	3227.78	-5.2362	37.6923	2.52999e-22	1.85572e-21
LOC100166729	1724.25	-5.23394	37.6332	2.33375e-20	1.51517e-19
LOC100164234	4694.16	-5.23183	37.5784	1.52169e-90	1.10553e-88
LOC100570271	4.4541	-5.23117	37.5612	1.82053e-07	4.81207e-07
LOC100165820	4.46162	-5.22972	37.5234	0.000158699	0.00031899
LOC100166051	6981.02	-5.22877	37.4986	1.417e-11	5.19676e-11
LOC100166230	4854.71	-5.2259	37.4243	3.38382e-114	3.98961e-112
LOC100165761	356.816	-5.22481	37.3961	2.50038e-09	7.74165e-09
LOC100161889	449.698	-5.22407	37.3767	1.35829e-23	1.07666e-22
LOC100168122	2411.17	-5.22279	37.3437	3.2996e-149	6.02483e-147
LOC100576067	4.4261	-5.22144	37.3087	5.50961e-08	1.52324e-07
LOC100159718	4.44148	-5.22055	37.2856	0.00140414	0.00254204
LOC100161829	27.3403	-5.21769	37.2117	1.63092e-11	5.96329e-11
LOC100166930	931.43	-5.21578	37.1626	3.69052e-37	5.7296e-36
LOC100165044	4.40632	-5.21429	37.1243	0.000313924	0.000611345
LOC100166130	453.553	-5.21258	37.0803	1.87169e-21	1.30116e-20
Catb-3483	1002.9	-5.21075	37.0332	3.26255e-41	6.10301e-40
LOC100572212	202.611	-5.20971	37.0067	1.15606e-36	1.75364e-35
LOC100569669	69.5148	-5.20811	36.9656	6.20549e-26	5.63052e-25
LOC100568643	448.151	-5.2078	36.9577	4.22122e-09	1.28328e-08
LOC100164409	126.564	-5.20676	36.9309	1.70257e-11	6.21534e-11
LOC100164406	45.8421	-5.20444	36.8718	1.86311e-12	7.22587e-12
LOC100165613	4.39341	-5.2036	36.8501	1.86907e-06	4.52104e-06
LOC103310468	4.37497	-5.20328	36.842	3.4494e-08	9.68584e-08
LOC100573263	1065.75	-5.2029	36.8322	1.4834e-42	2.93733e-41
LOC100569719	75.5319	-5.20108	36.7857	2.01139e-07	5.29822e-07
LOC100162098	15.8136	-5.19371	36.5985	3.41371e-08	9.59084e-08
LOC103307773	40.1214	-5.1858	36.3984	6.65583e-17	3.53176e-16
LOC100167646	411.531	-5.18358	36.3423	2.08159e-78	1.15146e-76
LOC100571039	45.2586	-5.18014	36.2559	8.8712e-08	2.40968e-07
LOC100572321	11.5741	-5.17753	36.1902	9.75132e-08	2.64179e-07
LOC100165207	3324.55	-5.17655	36.1658	7.5966e-10	2.45329e-09
LOC100163892	4.27538	-5.17093	36.025	0.000407278	0.000784042
LOC100165542	142.532	-5.16734	35.9356	1.3941e-08	4.05076e-08
LOC100161929	592.321	-5.16595	35.9009	1.96691e-31	2.37329e-30
LOC100570295	415.451	-5.16578	35.8966	4.52357e-25	3.91999e-24
LOC100572740	15.5336	-5.16424	35.8584	1.29686e-08	3.77834e-08
LOC100575399	260.475	-5.16393	35.8507	1.205e-07	3.23776e-07
LOC103310497	4.25607	-5.16362	35.843	2.07642e-07	5.46256e-07
LOC100163644	78.013	-5.16306	35.8291	0.0187428	0.0291997
LOC100572891	4.25058	-5.16131	35.7856	2.33887e-05	5.12021e-05
LOC100164831	380.38	-5.1601	35.7558	6.97693e-37	1.0703e-35
LOC100575214	157.044	-5.159	35.7284	1.10276e-16	5.76179e-16
LOC100571201	44.3138	-5.15894	35.7268	1.29335e-08	3.76865e-08
LOC103309076	4.25653	-5.15893	35.7267	1.00137e-07	2.7086e-07
LOC100165263	1809.38	-5.15845	35.7148	1.0456e-39	1.8314e-38
LOC100168683	15.5305	-5.15783	35.6995	8.39597e-11	2.9223e-10
LOC103310461	4.25326	-5.15717	35.6832	5.55328e-08	1.5347e-07
LOC100571091	50.8029	-5.1562	35.659	6.11763e-28	6.24876e-27
LOC100164372	17832.9	-5.15551	35.642	2.41896e-104	2.27901e-102
LOC100160127	538.93	-5.1547	35.622	4.64027e-09	1.40674e-08
LOC100159584	97.3028	-5.15409	35.607	3.05117e-11	1.09525e-10
LOC100160152	9495.73	-5.1512	35.5357	1.01212e-12	3.99143e-12
LOC100162110	209.957	-5.15075	35.5247	1.50652e-17	8.28463e-17
LOC100574931	11.9459	-5.15026	35.5126	4.14964e-07	1.06346e-06
LOC100165402	5205.8	-5.15004	35.5071	1.8388e-90	1.33122e-88
LOC100165995	297.174	-5.14821	35.4621	4.39386e-48	1.08573e-46
LOC100568512	181.967	-5.14805	35.4582	1.55262e-09	4.8782e-09
LOC100162367	1193.22	-5.14616	35.4118	2.16088e-36	3.23317e-35
LOC100163385	4.20078	-5.14602	35.4084	2.45426e-06	5.87525e-06
LOC100569789	460.598	-5.14593	35.4063	1.13625e-13	4.79238e-13
LOC100571223	4.19133	-5.14336	35.3433	0.000606168	0.00114345
LOC103310629	11.7765	-5.14328	35.3411	5.00292e-09	1.51135e-08
LOC100167750	6209.13	-5.1431	35.3367	6.10613e-103	5.59945e-101
LOC100163143	235.596	-5.143	35.3344	1.30792e-20	8.6191e-20
LOC100169125	12799.1	-5.14142	35.2958	1.26689e-54	3.90144e-53
LOC103308773	5.95422	-5.13992	35.2589	3.84584e-08	1.07595e-07
LOC100169250	787.065	-5.13958	35.2507	4.34303e-83	2.65904e-81
LOC103309306	4.20139	-5.13933	35.2445	2.46532e-07	6.44864e-07
LOC100575255	53.3295	-5.13839	35.2217	1.0546e-10	3.64542e-10
LOC100159244	4361.73	-5.1365	35.1756	1.37972e-23	1.0924e-22
LOC103309570	18.7764	-5.13382	35.1101	6.72938e-13	2.69032e-12
LOC103307615	353.913	-5.13377	35.109	1.73296e-21	1.20675e-20
LOC103310245	4.16002	-5.13374	35.1084	2.65004e-06	6.32338e-06
LOC100574612	4.15294	-5.1298	35.0126	0.000447661	0.00085794
LOC103307993	4.1481	-5.1273	34.952	2.57402e-05	5.60643e-05
LOC103310142	4.15472	-5.12718	34.9489	0.0122735	0.0196522
LOC100569327	255.668	-5.12382	34.8678	8.02099e-11	2.79698e-10
LOC100569884	236.059	-5.12051	34.7877	1.58739e-33	2.1365e-32
LOC100570227	15.1284	-5.11959	34.7657	7.68953e-10	2.47981e-09
LOC100161201	1679.78	-5.11751	34.7157	1.23572e-43	2.55733e-42
LOC100570979	23.1352	-5.11561	34.67	5.59968e-05	0.00011774
LOC100168043	1886.02	-5.11484	34.6514	4.19316e-36	6.18866e-35
LOC100161252	334.589	-5.11368	34.6234	1.604e-20	1.05165e-19
LOC100163575	4.11802	-5.11366	34.6231	5.81078e-06	1.34591e-05
LOC100169540	9680.16	-5.10861	34.502	4.00383e-42	7.80822e-41
LOC100575039	169.412	-5.10815	34.4911	1.30372e-08	3.79778e-08
LOC100162764	1518.88	-5.10709	34.4658	7.54779e-59	2.66667e-57
LOC100571771	111.767	-5.10619	34.4441	0.00116577	0.00213087
LOC100161523	48.8582	-5.10576	34.434	2.7102e-30	3.06745e-29
LOC100574395	4.07672	-5.10332	34.3758	0.000193633	0.000385901
LOC100164103	1031.01	-5.1032	34.3729	0.00275716	0.00482393
LOC100569827	36.4756	-5.10189	34.3418	1.96035e-14	8.73041e-14
LOC103309166	18.8544	-5.1016	34.3347	1.21889e-08	3.56224e-08
LOC100162688	1984.37	-5.10152	34.3329	1.64424e-52	4.77825e-51
LOC100167374	561.003	-5.09838	34.2582	3.37391e-40	6.02717e-39
LOC100163581	218.212	-5.09726	34.2317	6.95749e-84	4.29802e-82
LOC100159247	4.06369	-5.09347	34.1419	6.74641e-07	1.6961e-06
LOC100574728	378.337	-5.09251	34.1191	1.26813e-06	3.11307e-06
LOC100574201	4.03548	-5.09243	34.1174	5.71636e-07	1.44577e-06
LOC100167427	13312.5	-5.09195	34.1058	1.55978e-28	1.64199e-27
LOC100568467	58.0781	-5.08832	34.0202	4.71889e-16	2.36208e-15
LOC100302381	232.386	-5.08685	33.9857	3.20735e-65	1.33153e-63
LOC100572246	77.9568	-5.08607	33.9671	6.33418e-06	1.46255e-05
LOC100169619	657.755	-5.08493	33.9403	2.50521e-25	2.19584e-24
cprr1-8	58160.3	-5.08403	33.9192	6.88565e-41	1.26736e-39
LOC100165095	243.925	-5.08402	33.919	4.16713e-17	2.24024e-16
LOC100163867	12922.1	-5.084	33.9185	1.1017e-12	4.33391e-12
LOC100161473	2699.16	-5.08334	33.903	1.66934e-39	2.88713e-38
LOC100167781	11272.7	-5.08268	33.8875	5.25165e-15	2.43336e-14
LOC100166358	41.5129	-5.08233	33.8792	9.55466e-10	3.05646e-09
LOC100169544	18.0907	-5.08156	33.8611	3.50862e-05	7.52922e-05
LOC100574324	11.2125	-5.08069	33.8408	6.92914e-09	2.06932e-08
ORF2	4268.66	-5.07999	33.8244	1.11807e-62	4.3609e-61
LOC100573979	81.3607	-5.07906	33.8025	4.41661e-13	1.78682e-12
LOC100163979	164.987	-5.07827	33.7841	2.33938e-19	1.42849e-18
LOC100163627	2387.83	-5.07814	33.781	5.13051e-17	2.74741e-16
LOC100575441	4.01161	-5.07723	33.7598	6.02163e-08	1.65991e-07
LOC100571545	4.00741	-5.07581	33.7265	0.0185081	0.0288515
LOC100166492	95.401	-5.0756	33.7216	4.69118e-37	7.26129e-36
LOC100165764	21.1833	-5.07519	33.7119	4.75154e-09	1.43857e-08
LOC100570283	22.3256	-5.07353	33.6733	2.3061e-14	1.02194e-13
LOC100166916	3811.07	-5.07146	33.6249	9.09503e-19	5.37393e-18
LOC103308414	33.8535	-5.07026	33.597	3.3381e-11	1.19367e-10
LOC100573692	26.9984	-5.06849	33.5559	5.7172e-05	0.00012004
cp54	85.2208	-5.06546	33.4854	1.07621e-05	2.42869e-05
LOC100159791	4185.8	-5.06511	33.4774	2.30789e-24	1.92166e-23
LOC100575021	72.0448	-5.06211	33.4077	4.77664e-07	1.216e-06
LOC100159720	110.447	-5.06187	33.4022	6.43077e-15	2.9591e-14
LOC103309312	11.044	-5.06019	33.3633	3.00867e-07	7.81739e-07
LOC100571749	161.172	-5.05796	33.3118	9.65331e-10	3.08657e-09
LOC100166008	3205.11	-5.05292	33.1957	1.71716e-39	2.96734e-38
LOC103310630	3.9408	-5.05228	33.1808	3.59894e-07	9.27284e-07
LOC100167449	52.7675	-5.05169	33.1673	9.76746e-12	3.61752e-11
LOC100159863	62.4725	-5.05167	33.167	0.00324949	0.00562567
LOC100575491	61.1173	-5.05161	33.1655	7.44376e-09	2.21754e-08
LOC103308315	3.93879	-5.05119	33.1557	0.00033543	0.000650769
LOC103309275	3.91906	-5.04703	33.0604	1.86942e-07	4.93749e-07
LOC100302376	339.982	-5.04694	33.0583	1.28767e-27	1.2935e-26
LOC100302461	136.299	-5.04442	33.0005	7.61078e-29	8.12381e-28
LOC100168275	3505.39	-5.04201	32.9456	8.15701e-121	1.06521e-118
LOC100159009	481.474	-5.03806	32.8555	1.99791e-25	1.7579e-24
LOC100162536	204.205	-5.03636	32.8168	8.26557e-05	0.000170851
LOC100159070	7301.15	-5.03077	32.6899	5.30107e-26	4.84183e-25
LOC100166524	3333.04	-5.03051	32.6839	1.01599e-33	1.37281e-32
LOC103310848	13.5499	-5.02923	32.655	8.18201e-08	2.22893e-07
LOC100162449	237.263	-5.02579	32.5771	1.50685e-38	2.49126e-37
LOC100161450	3.86216	-5.02289	32.5117	0.0124397	0.0198937
LOC100158793	108.607	-5.02223	32.4969	3.46829e-13	1.41565e-12
LOC100162249	1988.69	-5.01689	32.3767	3.13641e-26	2.89546e-25
LOC100165116	1182.06	-5.01224	32.2727	5.04867e-49	1.30538e-47
LOC100164217	2297.75	-5.01212	32.2701	8.92247e-49	2.27843e-47
LOC100166640	93.2529	-5.00798	32.1776	3.9958e-08	1.11639e-07
Catb-1852	87.5296	-5.00773	32.172	0.001541	0.00277447
LOC100163145	1321.97	-5.00615	32.1368	3.73107e-49	9.70784e-48
LOC100166909	236.501	-5.0046	32.1022	7.03735e-60	2.54293e-58
LOC100574114	235.842	-5.00183	32.0406	3.01124e-34	4.15591e-33
LOC100573846	367.987	-5.00167	32.0371	3.0491e-36	4.5293e-35
LOC100573900	111.691	-5.00029	32.0064	2.11391e-08	6.04189e-08
LOC100162079	3783.79	-4.99924	31.9832	1.38996e-47	3.38996e-46
LOC100575757	10886	-4.99785	31.9524	3.19601e-37	4.96935e-36
LOC100164097	2904.53	-4.99665	31.9258	2.41246e-07	6.31678e-07
LOC100573594	54.1241	-4.99623	31.9165	5.64909e-16	2.81133e-15
LOC100572962	383.222	-4.99588	31.9088	2.28656e-19	1.39913e-18
LOC100568712	3.77622	-4.99122	31.8059	0.0163182	0.0256568
LOC100572193	48.5405	-4.98927	31.7628	1.31853e-19	8.19683e-19
LOC100569551	105.776	-4.98172	31.5972	3.87513e-06	9.12839e-06
LOC100165938	1043.53	-4.98087	31.5786	5.62412e-38	9.06582e-37
LOC100570891	171.52	-4.97727	31.4997	7.07511e-12	2.64698e-11
LOC103308426	3.75833	-4.97722	31.4986	3.35905e-07	8.6822e-07
LOC103312028	13.8715	-4.9744	31.4371	1.15223e-10	3.97095e-10
LOC100159743	641.504	-4.97404	31.4293	1.72226e-32	2.19354e-31
LOC100570811	33.3067	-4.97287	31.4039	1.91458e-06	4.62733e-06
LOC100163602	3370.54	-4.96971	31.3352	3.20738e-67	1.39911e-65
LOC100575867	61.3074	-4.96927	31.3256	3.96709e-17	2.13548e-16
LOC100570456	3.70299	-4.96486	31.23	1.56595e-05	3.48508e-05
LOC100573203	51.305	-4.96481	31.2289	2.41218e-09	7.47531e-09
LOC100168150	965.519	-4.96401	31.2115	3.27866e-30	3.69867e-29
LOC100161197	46.8176	-4.96388	31.2089	3.95765e-11	1.40766e-10
Spn5	825.187	-4.96291	31.1879	2.93596e-63	1.16495e-61
ACYPI26172	287.755	-4.96136	31.1544	3.055e-11	1.09605e-10
LOC100159688	997.366	-4.96114	31.1495	4.31077e-07	1.10284e-06
LOC100160192	176.715	-4.95726	31.066	5.94093e-09	1.78427e-08
LOC100163616	13.5705	-4.95679	31.0558	1.53056e-06	3.73111e-06
LOC100568909	13.4453	-4.94993	30.9084	1.27727e-07	3.42613e-07
LOC100574937	3.66658	-4.94986	30.9069	0.000750584	0.00140279
LOC100166270	3.67119	-4.94904	30.8894	0.000560326	0.00106047
LOC103309044	52.1968	-4.94672	30.8398	1.40726e-16	7.3194e-16
LOC100160248	328.362	-4.94625	30.8297	1.35228e-24	1.13977e-23
LOC100160226	4127.76	-4.94538	30.8111	2.86448e-22	2.09362e-21
LOC100168085	520.012	-4.94533	30.8101	3.54986e-14	1.54916e-13
LOC100569104	492.172	-4.94468	30.7962	8.27469e-08	2.25299e-07
LOC100158924	23.0847	-4.94388	30.7791	7.27414e-12	2.71897e-11
LOC100571522	1353.86	-4.94247	30.749	6.1627e-67	2.66572e-65
LOC100166202	1433.02	-4.94172	30.733	5.68086e-33	7.43267e-32
LOC100570978	7.31572	-4.94123	30.7227	1.47113e-07	3.92625e-07
LOC100163220	1113.82	-4.9407	30.7114	3.98162e-73	1.97958e-71
LOC100168297	3.66096	-4.93949	30.6857	3.23097e-06	7.65821e-06
LOC100168232	53933.3	-4.93756	30.6446	2.00294e-41	3.79492e-40
LOC100571910	147.143	-4.93537	30.598	8.19596e-43	1.64022e-41
LOC100168964	505.8	-4.93522	30.5949	1.10118e-19	6.87876e-19
AANAT4	222.237	-4.93456	30.581	8.23634e-06	1.88195e-05
NV243	404.557	-4.93248	30.5369	6.03377e-27	5.80937e-26
LOC100160214	1288.79	-4.93169	30.5202	3.39041e-07	8.75852e-07
LOC100570201	3.62406	-4.9315	30.5161	0.000283187	0.000553629
LOC100163518	651.311	-4.93042	30.4932	6.379e-09	1.91277e-08
LOC100166279	758.22	-4.93018	30.4882	5.70638e-36	8.35626e-35
LOC100159756	1734.13	-4.92989	30.4822	1.98404e-13	8.22024e-13
LOC100569280	2893.02	-4.92882	30.4594	1.81705e-65	7.63568e-64
LOC100162206	1550.46	-4.92527	30.3847	1.12411e-07	3.03266e-07
LOC100568976	3.60651	-4.9247	30.3726	0.000325579	0.000633206
LOC100302326	1106.25	-4.92392	30.3562	5.03958e-24	4.10184e-23
LOC100571879	472.606	-4.92322	30.3415	4.95649e-109	4.98864e-107
LOC100569741	13.35	-4.9231	30.3389	1.46542e-09	4.6155e-09
LOC100571415	3.59479	-4.91658	30.2021	7.68589e-07	1.92338e-06
LOC100570485	64.1918	-4.91652	30.2009	3.72569e-12	1.42014e-11
LOC100569071	3.58729	-4.91515	30.1723	0.0151089	0.0238809
LOC100571057	256.377	-4.91439	30.1563	5.13404e-06	1.1956e-05
LOC100168667	3.57948	-4.91221	30.1108	0.0216493	0.0333874
LOC100161452	708.636	-4.91068	30.0788	1.24265e-12	4.8689e-12
LOC100572098	3.56819	-4.90655	29.9929	6.3866e-05	0.000133524
LOC100575681	249.99	-4.90578	29.977	1.43644e-40	2.60211e-39
LOC103311941	3.5553	-4.90454	29.9511	3.02601e-06	7.18644e-06
LOC100570108	3.55299	-4.90191	29.8967	0.0149668	0.0236727
LOC100158783	9924.45	-4.90065	29.8705	4.11578e-36	6.07881e-35
LOC100160002	750.618	-4.89851	29.8263	3.41259e-13	1.39402e-12
LOC100575028	3.52172	-4.89349	29.7227	2.4303e-06	5.81991e-06
LOC100164608	9224.74	-4.89211	29.6942	4.67483e-49	1.21176e-47
LOC100570529	3.51934	-4.8891	29.6324	0.0242836	0.0371006
LOC100573104	531.99	-4.88351	29.5176	1.71405e-33	2.30097e-32
LOC100158949	10.0224	-4.87886	29.4228	8.25892e-07	2.06203e-06
LOC100167612	453.826	-4.87629	29.3704	8.18867e-115	9.71016e-113
LOC100568811	737.133	-4.87536	29.3514	6.74713e-22	4.81708e-21
LOC103307861	3.49171	-4.87479	29.3398	4.94149e-06	1.15194e-05
LOC100167380	776.697	-4.87284	29.3002	9.27622e-56	2.97199e-54
LOC100572964	328.024	-4.87154	29.2739	4.72732e-37	7.31176e-36
LOC100166514	15.9764	-4.87099	29.2628	2.73223e-11	9.83333e-11
LOC100166258	9.73917	-4.87079	29.2586	3.24958e-07	8.41473e-07
LOC100164459	70.9741	-4.87057	29.2541	6.78673e-11	2.37703e-10
LOC100160164	118.719	-4.86963	29.2351	1.37334e-51	3.85526e-50
LOC100169271	61.2921	-4.86893	29.2209	3.60126e-20	2.31551e-19
LOC103308231	3.49425	-4.86881	29.2185	2.02851e-06	4.89237e-06
LOC103307872	3.46013	-4.86735	29.189	0.000399664	0.000770032
LOC100573788	146.072	-4.86724	29.1867	2.10572e-34	2.91788e-33
LOC100569377	3.47361	-4.86693	29.1805	0.00156383	0.00281386
LOC100161085	1654.17	-4.86572	29.156	1.51352e-30	1.74071e-29
LOC100571633	3.46643	-4.86502	29.1419	1.31697e-06	3.22643e-06
LOC100160421	12207.4	-4.86483	29.138	1.8765e-19	1.15438e-18
LOC103308377	21.5252	-4.86426	29.1266	3.96908e-10	1.308e-09
LOC103309597	361.223	-4.86331	29.1074	8.21473e-57	2.72938e-55
LOC100160411	323.989	-4.86296	29.1002	1.67615e-37	2.64e-36
LOC100168974	90.8361	-4.8622	29.0849	6.26336e-15	2.88464e-14
LOC100575715	37.3318	-4.86151	29.071	2.32174e-09	7.20369e-09
LOC103307721	3.45741	-4.86147	29.0702	6.0374e-07	1.52248e-06
LOC100571399	2429.36	-4.86112	29.0633	2.71965e-25	2.37672e-24
LOC100573042	855.042	-4.86084	29.0576	7.26792e-25	6.2353e-24
LOC100162298	2755.3	-4.85818	29.0041	1.18657e-116	1.44867e-114
LOC100163606	9.60847	-4.85714	28.9831	1.52889e-07	4.07238e-07
LOC103309233	3.44438	-4.85535	28.9471	0.0181613	0.0283494
LOC100574851	13.1623	-4.8542	28.9241	1.8437e-06	4.46283e-06
LOC100167984	1176.75	-4.85393	28.9187	7.6834e-09	2.28596e-08
LOC100570184	297.537	-4.85341	28.9082	1.28453e-11	4.72185e-11
LOC100160726	112.885	-4.85292	28.8985	5.42773e-27	5.24299e-26
LOC100159353	2445.56	-4.85116	28.8633	1.71475e-27	1.71334e-26
LOC100574379	6.83564	-4.85078	28.8557	0.000230047	0.000454085
LOC103312034	13.0613	-4.85056	28.8512	3.60004e-07	9.27452e-07
LOC100160704	1215.91	-4.84773	28.7946	1.12133e-39	1.95408e-38
LOC100572031	125.975	-4.84729	28.786	4.33382e-08	1.20789e-07
LOC100163715	10951.4	-4.84722	28.7845	1.1493e-53	3.45174e-52
LOC100168276	199.821	-4.8446	28.7322	4.31714e-11	1.53341e-10
LOC100571261	3.39671	-4.84196	28.6796	1.28254e-06	3.14583e-06
LOC100574101	437.499	-4.84172	28.6749	4.14183e-14	1.79988e-13
LOC100164540	291.318	-4.84017	28.6441	6.97776e-15	3.20508e-14
LOC100164207	140.275	-4.83812	28.6036	1.15961e-27	1.1677e-26
LOC103312001	16.426	-4.83681	28.5775	1.84922e-09	5.77956e-09
LOC100570797	215.608	-4.83639	28.5692	1.74697e-23	1.37263e-22
LOC100302371	996.359	-4.83544	28.5504	0.000102951	0.000210733
LOC103309936	9.35654	-4.8347	28.5358	1.72003e-08	4.95731e-08
LOC100169082	2754.86	-4.83399	28.5217	1.1253e-14	5.08838e-14
LOC100164792	4142.13	-4.83195	28.4814	6.08696e-146	1.07344e-143
LOC100163267	317.288	-4.83029	28.4487	5.98385e-06	1.38476e-05
LOC100573641	6.77338	-4.82376	28.3202	6.56856e-08	1.80321e-07
LOC100571149	3.35941	-4.8206	28.2582	0.0164396	0.0258378
LOC100159133	262.35	-4.81909	28.2287	2.5097e-18	1.44887e-17
LOC100572122	503.095	-4.81731	28.1939	1.33562e-24	1.12619e-23
LOC103309912	21.3072	-4.81717	28.1911	1.57232e-11	5.75309e-11
LOC100573499	123.859	-4.81626	28.1733	3.32869e-08	9.35961e-08
LOC100574236	3.34509	-4.81482	28.1453	0.000728447	0.00136265
LOC100568587	186.815	-4.81367	28.1228	3.74462e-31	4.44806e-30
LOC100168798	310.891	-4.81249	28.0998	8.49192e-10	2.72834e-09
LOC100159077	824.466	-4.81225	28.0951	5.29131e-38	8.54938e-37
LOC100168852	1232.81	-4.81101	28.0709	6.52843e-48	1.6055e-46
LOC103308614	12.5029	-4.80987	28.0488	5.53623e-09	1.6666e-08
LOC100167091	3.32385	-4.80965	28.0447	0.00197302	0.00351579
LOC100159887	12.3858	-4.80954	28.0424	2.58278e-09	7.98839e-09
LOC100160088	4177.07	-4.80571	27.9682	9.30442e-100	7.70996e-98
LOC100575838	3.31999	-4.80471	27.9488	0.0192759	0.0299511
LOC100574120	8.99055	-4.8027	27.9098	4.31381e-07	1.10348e-06
LOC100572792	415.338	-4.80268	27.9094	5.00555e-22	3.59358e-21
LOC103308983	102.919	-4.80245	27.905	2.35404e-15	1.11786e-14
LOC100166940	153.121	-4.80217	27.8995	2.60247e-91	1.90414e-89
LOC100573887	29.3414	-4.80085	27.8741	8.93306e-06	2.03417e-05
LOC100575129	6.62924	-4.79547	27.7704	3.15895e-05	6.81855e-05
LOC100574961	3.29703	-4.79546	27.7701	0.00142719	0.00258037
LOC100167962	29.5584	-4.79453	27.7521	3.46195e-06	8.1878e-06
LOC100167428	104.413	-4.79432	27.7481	0.000687901	0.00129078
LOC100159932	2148.83	-4.79161	27.6962	7.69394e-35	1.08658e-33
LOC100574887	102.389	-4.79145	27.6929	1.54822e-23	1.22019e-22
LOC100158912	152.073	-4.79118	27.6878	1.01375e-07	2.74101e-07
LOC100162456	21.1823	-4.79063	27.6773	1.71618e-13	7.13191e-13
LOC103311860	756.077	-4.78991	27.6635	3.64764e-28	3.77631e-27
LOC100166545	11534.2	-4.7894	27.6537	2.05e-22	1.5155e-21
LOC100573041	140.691	-4.78929	27.6516	1.04012e-25	9.28636e-25
LOC100165631	6.6289	-4.78897	27.6455	0.000916119	0.00169603
LOC100166494	186.928	-4.78862	27.6388	1.57154e-38	2.59405e-37
LOC100166752	6.57499	-4.78724	27.6123	4.20665e-06	9.87101e-06
LOC100572826	15.2702	-4.78316	27.5343	1.87035e-11	6.80977e-11
LOC100164120	1144.06	-4.78007	27.4754	8.86254e-15	4.04023e-14
LOC100159959	200.304	-4.77844	27.4445	0.00531376	0.00893187
LOC100160634	81.0457	-4.77705	27.4179	1.16359e-05	2.61699e-05
LOC100161530	1287.77	-4.77039	27.2918	7.57254e-11	2.64328e-10
Catb-912	737.75	-4.76938	27.2725	3.98351e-33	5.25186e-32
LOC100569329	130.752	-4.7674	27.2352	1.35615e-21	9.4917e-21
LOC100162472	786.612	-4.76495	27.1889	1.79989e-24	1.50903e-23
ACYPI44554	284.698	-4.7647	27.1843	6.86717e-09	2.0514e-08
LOC100159895	193.852	-4.76413	27.1735	5.62108e-16	2.79806e-15
LOC100163600	770.419	-4.76377	27.1667	5.10715e-33	6.70298e-32
LOC103310585	3.23303	-4.76235	27.1399	2.45787e-06	5.8832e-06
LOC100574813	636.762	-4.76138	27.1218	2.65666e-21	1.82899e-20
LOC100575760	105.31	-4.76128	27.12	1.34875e-12	5.27159e-12
LOC100165452	6472.07	-4.75992	27.0943	8.49582e-37	1.2956e-35
LOC100161961	1311.79	-4.7592	27.0808	3.06103e-18	1.76321e-17
LOC100572347	278.31	-4.75718	27.0429	4.82943e-16	2.41506e-15
LOC100570425	178.143	-4.75703	27.04	1.17846e-09	3.74022e-09
LOC100165869	436.358	-4.7562	27.0246	4.33647e-18	2.47372e-17
LOC103309713	9.13683	-4.75378	26.9793	2.55083e-06	6.09793e-06
LOC103310044	3.2023	-4.7526	26.9572	0.0167622	0.0263087
LOC100162552	19730.7	-4.75047	26.9174	6.75331e-100	5.61859e-98
LOC103310565	3.20057	-4.74952	26.8997	0.000759594	0.00141873
LOC100574493	504.308	-4.74925	26.8948	1.108e-21	7.81318e-21
LOC100570533	67.8862	-4.74893	26.8888	3.37523e-10	1.12216e-09
LOC103309781	3.19131	-4.74768	26.8655	0.0216923	0.0334461
LOC100571418	6.42713	-4.74682	26.8495	8.83671e-06	2.01312e-05
LOC100161803	237.987	-4.74645	26.8426	3.56761e-14	1.55658e-13
LOC103309808	4.55103	-4.74584	26.8312	3.37411e-07	8.71968e-07
LOC100572534	8.71221	-4.74317	26.7817	1.63873e-07	4.34825e-07
LOC100164280	916.308	-4.74269	26.7726	3.03054e-29	3.28927e-28
LOC100159669	292.062	-4.74053	26.7326	1.02707e-48	2.61625e-47
LOC103310917	3.17322	-4.74025	26.7275	0.018781	0.029248
LOC103308516	29.6759	-4.73952	26.7139	3.62102e-16	1.8285e-15
LOC100161848	85.1766	-4.73945	26.7126	7.8153e-31	9.13098e-30
LOC100162409	2416.87	-4.73915	26.7071	1.78535e-51	4.99824e-50
LOC100169242	40.124	-4.73884	26.7013	0.0257777	0.0392004
LOC100167412	8.87904	-4.73858	26.6965	5.14656e-07	1.30614e-06
LOC100166269	3827.28	-4.7369	26.6655	7.79381e-58	2.66683e-56
LOC100161394	3.17122	-4.7364	26.6562	1.69782e-05	3.76639e-05
LOC100575224	612.719	-4.73627	26.6539	4.85694e-50	1.29978e-48
LOC100572407	3.17241	-4.73401	26.6121	1.33126e-06	3.25951e-06
LOC100160804	3.15293	-4.7312	26.5603	0.00176618	0.00316142
LOC103310246	3.17555	-4.73063	26.5498	6.20603e-06	1.4344e-05
LOC100161864	1294.26	-4.72665	26.4767	2.21768e-10	7.4877e-10
LOC100158796	6609.68	-4.72573	26.4598	1.51002e-24	1.27065e-23
LOC100568592	53.0814	-4.7249	26.4445	1.30973e-07	3.51003e-07
LOC100168006	214.922	-4.72251	26.4009	1.20505e-08	3.52229e-08
LOC100569691	80.7045	-4.72186	26.3889	4.3354e-06	1.01593e-05
LOC100162087	221.925	-4.72052	26.3644	1.7165e-55	5.46552e-54
LOC100568885	358.13	-4.72014	26.3574	3.40666e-43	6.91146e-42
LOC100572887	230.045	-4.71836	26.325	3.62508e-25	3.1533e-24
LOC100160079	3424.45	-4.71515	26.2664	4.64315e-100	3.87863e-98
LOC103309877	3.11139	-4.71408	26.2469	1.085e-06	2.68267e-06
LOC100168026	4119.35	-4.71351	26.2366	7.52889e-67	3.24308e-65
LOC100169535	67.2712	-4.70968	26.167	5.56413e-10	1.81452e-09
LOC100568835	3.08685	-4.70859	26.1473	8.49141e-06	1.93809e-05
LOC100168249	89.2176	-4.70798	26.1362	3.57736e-22	2.59282e-21
LOC100160667	23315.5	-4.70592	26.099	7.23236e-34	9.82392e-33
LOC100569509	746.146	-4.70493	26.0811	2.05574e-20	1.33847e-19
LOC100166797	263.718	-4.70291	26.0445	4.39681e-20	2.81649e-19
LOC100568742	253.447	-4.70116	26.013	3.1149e-17	1.68731e-16
LOC100569251	1603.49	-4.70025	25.9965	9.26824e-06	2.10584e-05
LOC100570455	3.0892	-4.70014	25.9947	0.00151859	0.00273555
LOC103308649	297.333	-4.69849	25.9648	4.24149e-42	8.24832e-41
LOC100575608	16.9677	-4.69368	25.8785	3.28703e-10	1.09354e-09
NV237	448.477	-4.69194	25.8472	1.87263e-10	6.35284e-10
LOC100163300	2296.52	-4.69058	25.8229	4.16243e-20	2.66719e-19
LOC103308484	3.05921	-4.68915	25.7974	0.000705843	0.00132277
ORF1	3264.91	-4.6888	25.7911	4.23426e-09	1.28706e-08
LOC100573008	30.5691	-4.68726	25.7635	0.00336057	0.0058024
LOC100164853	881.921	-4.68721	25.7627	3.09851e-23	2.40164e-22
LOC100162794	578.777	-4.68613	25.7433	7.0755e-28	7.20933e-27
LOC100159282	80.2042	-4.68482	25.7201	8.66508e-19	5.12723e-18
LOC100165768	3.05052	-4.68283	25.6845	0.0245376	0.0374637
NV12	1406.05	-4.68127	25.6568	5.00518e-10	1.63794e-09
LOC100166533	632.705	-4.67936	25.6229	5.537e-45	1.21537e-43
LOC100568637	3.04535	-4.67906	25.6175	0.0267536	0.0406007
LOC100161508	51794.1	-4.67842	25.6062	8.42723e-24	6.75784e-23
LOC100570397	3.04862	-4.67693	25.5797	3.70727e-06	8.74896e-06
LOC103310320	3.03398	-4.67554	25.5551	0.00208553	0.00370508
LOC100166088	662.862	-4.67334	25.5161	6.8544e-18	3.8599e-17
LOC100167447	1459.15	-4.67317	25.5132	3.13342e-102	2.78672e-100
LOC100161869	3354.05	-4.67237	25.499	2.43072e-05	5.30946e-05
LOC100568884	10.5231	-4.66799	25.4217	2.31123e-06	5.54377e-06
LOC100575120	62.6783	-4.665	25.369	1.02085e-11	3.77815e-11
LOC100159557	29.2853	-4.66483	25.3661	4.8169e-13	1.94457e-12
LOC100574040	3.0023	-4.66355	25.3436	0.00110256	0.00202251
LOC100168795	6.09725	-4.66342	25.3414	5.49251e-07	1.39051e-06
LOC100569361	99.36	-4.6625	25.3252	5.55683e-06	1.28941e-05
LOC100301916	435.709	-4.66183	25.3133	1.44586e-30	1.66568e-29
LOC100574781	131.597	-4.66178	25.3125	3.5851e-42	7.00487e-41
LOC100571410	100.229	-4.66177	25.3123	3.49817e-10	1.16098e-09
LOC100571846	41.6591	-4.6599	25.2796	1.36561e-18	7.98656e-18
LOC100164168	22.1326	-4.65912	25.266	6.64237e-13	2.65656e-12
LOC100169609	1078.78	-4.65742	25.2362	2.57701e-65	1.07417e-63
LOC100159588	6436.19	-4.65557	25.2039	1.39686e-20	9.19052e-20
LOC100166135	570.117	-4.65534	25.1998	1.25558e-25	1.11617e-24
ORF5	4917.49	-4.65505	25.1948	8.03313e-18	4.50769e-17
LOC100164843	1945.51	-4.65474	25.1893	5.52399e-05	0.000116208
LOC100572854	623.561	-4.65441	25.1835	1.17267e-18	6.8777e-18
LOC100158663	1327.57	-4.6536	25.1694	1.26917e-23	1.00719e-22
LOC103309089	37.327	-4.6522	25.145	4.86832e-15	2.26234e-14
ACYPI56506	1089.92	-4.65126	25.1287	8.87608e-20	5.57504e-19
LOC100574425	62.0493	-4.64754	25.064	1.51824e-13	6.33359e-13
LOC100168897	112.575	-4.64754	25.0639	0.000756801	0.00141377
LOC103311460	143.372	-4.64583	25.0342	1.39687e-11	5.12383e-11
LOC100573545	2.96836	-4.64366	24.9966	0.019219	0.0298761
LOC100572954	302.116	-4.64229	24.9728	7.29165e-21	4.87994e-20
LOC100576042	404.937	-4.64202	24.9682	1.28808e-12	5.04211e-12
LOC100570017	250.217	-4.64114	24.953	6.31379e-09	1.89377e-08
LOC100164539	2.95045	-4.63662	24.8749	0.0237147	0.0363014
LOC100169331	4081.07	-4.63631	24.8696	3.14701e-101	2.71683e-99
LOC100160301	1713.32	-4.63424	24.8339	2.06486e-17	1.1265e-16
LOC100569170	25.2516	-4.63403	24.8302	5.71781e-13	2.29659e-12
LOC100163959	484.694	-4.63358	24.8225	1.30458e-11	4.79299e-11
LOC100164759	5.96406	-4.63245	24.8031	0.00493425	0.00832516
LOC100162812	2117.52	-4.63135	24.7842	2.68811e-67	1.17508e-65
LOC100159455	669.327	-4.63038	24.7675	1.25272e-05	2.80949e-05
Catb-1874	910.986	-4.62919	24.7471	1.17812e-17	6.52916e-17
LOC100160648	15220.1	-4.62642	24.6997	2.40043e-25	2.10579e-24
LOC100166349	111.361	-4.6245	24.6669	3.18777e-22	2.32004e-21
LOC100169466	14.7465	-4.6241	24.66	4.23713e-06	9.94027e-06
LOC100574879	164.022	-4.62253	24.6332	1.96922e-07	5.1898e-07
LOC100569871	16.0035	-4.61987	24.5879	5.2527e-07	1.33226e-06
LOC100160062	28.8832	-4.6193	24.578	2.47839e-05	5.40555e-05
LOC100165772	27.1498	-4.61737	24.5452	7.31703e-21	4.89534e-20
LOC100573107	2.91505	-4.61718	24.5419	0.0215575	0.0332483
LOC100569370	2.9037	-4.61528	24.5096	1.70667e-05	3.7848e-05
LOC100164711	293.618	-4.61514	24.5072	0.00583844	0.00975421
LOC100159803	301.101	-4.61511	24.5069	4.59724e-18	2.61758e-17
LOC100160076	8.16217	-4.61476	24.5008	2.09695e-07	5.51446e-07
Catb-10270	2863.31	-4.61279	24.4675	1.13748e-14	5.13782e-14
LOC100572703	48.6059	-4.60939	24.4099	0.00138206	0.00250471
LOC103307611	263.96	-4.60883	24.4003	0.000268189	0.000525903
LOC100159087	12729.8	-4.60661	24.3628	6.44142e-19	3.83456e-18
LOC100302480	234.02	-4.60652	24.3613	9.36997e-46	2.12919e-44
LOC103309490	421.847	-4.60415	24.3213	1.04495e-25	9.32549e-25
LOC100159331	1767.78	-4.6024	24.2918	1.8261e-05	4.03792e-05
LOC100573772	65.7745	-4.60176	24.2811	1.56534e-05	3.48448e-05
LOC100166005	157.711	-4.59933	24.2403	1.73309e-39	2.98986e-38
LOC100569360	1045.2	-4.59468	24.1622	1.82709e-19	1.12532e-18
LOC100164594	402.297	-4.59322	24.1377	7.63677e-13	3.04188e-12
LOC100575107	2.86809	-4.59288	24.1321	0.0101311	0.0164142
LOC100160930	125.138	-4.59083	24.0977	1.38491e-29	1.51994e-28
LOC100167397	2666.63	-4.58951	24.0757	1.4421e-41	2.74237e-40
LOC103307911	8.01914	-4.589	24.0672	5.46335e-07	1.3833e-06
LOC100163384	94.824	-4.58385	23.9816	4.53131e-08	1.26054e-07
LOC100569402	75.6423	-4.58175	23.9467	1.67981e-08	4.84681e-08
LOC100574067	13.4976	-4.58105	23.935	0.00395612	0.00677231
LOC100569225	1253.67	-4.58035	23.9234	2.09806e-17	1.14431e-16
LOC100570137	2.83784	-4.5792	23.9043	0.00317198	0.00549933
LOC100574308	2.83364	-4.57765	23.8787	0.00178738	0.00319742
LOC100158751	750.229	-4.57687	23.8658	4.8902e-09	1.47838e-08
LOC103311606	257.116	-4.57476	23.8309	2.53725e-08	7.2079e-08
LOC100573024	289.222	-4.57434	23.824	2.10731e-16	1.0816e-15
LOC100168583	303.116	-4.57185	23.7829	1.06416e-41	2.03493e-40
LOC100573486	444.669	-4.56479	23.6667	4.67825e-63	1.84211e-61
LOC100164585	762.688	-4.56413	23.6559	3.64531e-37	5.66368e-36
LOC100573306	13.8307	-4.56178	23.6174	9.08105e-05	0.000186995
LOC100160869	244.698	-4.55873	23.5676	7.33923e-05	0.00015259
LOC100569575	2.79197	-4.55827	23.5601	0.0009749	0.00179888
LOC100162090	902.044	-4.55703	23.5398	0.000124769	0.000253456
LOC100167823	167.58	-4.55654	23.5319	8.21921e-20	5.17349e-19
LOC100570310	10.5858	-4.55614	23.5253	1.17175e-07	3.15293e-07
LOC100575100	67.0787	-4.55557	23.516	7.55767e-08	2.06403e-07
LOC100167651	267.803	-4.55494	23.5058	1.13616e-14	5.13298e-14
LOC100572522	563.799	-4.55411	23.4921	2.75567e-19	1.67574e-18
LOC100158777	83.7004	-4.5521	23.4596	2.36129e-11	8.53998e-11
LOC100570393	2.78241	-4.55136	23.4475	0.0223156	0.0343379
LOC100571677	2.77427	-4.54996	23.4248	0.000995739	0.00183487
LOC100169176	520.404	-4.54932	23.4143	2.63975e-18	1.52267e-17
LOC100163179	12.5501	-4.54708	23.3779	0.00456289	0.00773274
LOC100166559	423.938	-4.54478	23.3408	1.88499e-35	2.71789e-34
LOC100570215	2.77384	-4.5443	23.3331	0.00172922	0.00309848
LOC100572189	2.77479	-4.54397	23.3276	7.24143e-06	1.66254e-05
LOC100169287	1003.41	-4.54348	23.3197	5.72088e-06	1.32583e-05
LOC100572007	1683.55	-4.54043	23.2705	1.26459e-49	3.34945e-48
LOC100163281	559.264	-4.53998	23.2633	4.07579e-07	1.04508e-06
LOC100574719	804.998	-4.53961	23.2573	3.09348e-32	3.89668e-31
LOC100162777	14231.6	-4.53616	23.2017	1.56235e-77	8.50552e-76
LOC100159313	719.01	-4.53598	23.1988	5.75709e-26	5.23517e-25
LOC100164767	3486.27	-4.53554	23.1918	1.12681e-12	4.42931e-12
LOC100573187	2.75314	-4.53454	23.1757	0.00126592	0.00230476
LOC100160452	181.487	-4.52951	23.0951	1.80016e-10	6.11504e-10
LOC100165959	220.172	-4.52549	23.0308	0.00216114	0.00383247
LOC100571172	10.657	-4.5226	22.9847	2.48965e-08	7.07855e-08
LOC100162547	587.872	-4.52115	22.9615	9.77545e-12	3.61983e-11
LOC100166910	39.1253	-4.5205	22.9512	1.15116e-17	6.38836e-17
LOC100572124	521.869	-4.52023	22.9469	5.83121e-24	4.72938e-23
LOC100158789	662.302	-4.51998	22.9429	2.20174e-26	2.04818e-25
LOC100162138	410.801	-4.51954	22.936	0.000147661	0.000297673
LOC100568787	68.1272	-4.51719	22.8986	2.49413e-08	7.09029e-08
LOC100159213	1289.67	-4.51643	22.8866	3.89931e-201	1.21901e-198
LOC100162117	78.8854	-4.51632	22.8848	1.24625e-28	1.31731e-27
LOC100160267	133.474	-4.51412	22.85	7.051e-46	1.60933e-44
LOC100168142	646.99	-4.51326	22.8364	1.56731e-15	7.54865e-15
LOC100570895	102.286	-4.51208	22.8177	2.42972e-10	8.16887e-10
LOC100573202	433.769	-4.51094	22.7997	5.15849e-31	6.082e-30
LOC100159178	458.46	-4.51033	22.7899	8.63144e-08	2.34641e-07
LOC100568566	12.473	-4.50984	22.7823	5.74383e-07	1.452e-06
LOC100575848	20.6907	-4.50616	22.7243	1.40547e-13	5.88337e-13
LOC100570409	2.69924	-4.50605	22.7225	7.48572e-05	0.000155448
LOC100164011	1787.29	-4.50581	22.7187	3.72261e-81	2.18828e-79
LOC103308615	20.4849	-4.50531	22.7109	6.04348e-13	2.42362e-12
LOC103308913	2.7024	-4.50517	22.7086	0.00285249	0.00497972
LOC103309645	30.5289	-4.50341	22.681	5.46872e-19	3.27821e-18
LOC100568682	27.5905	-4.50238	22.6648	1.63469e-06	3.97554e-06
LOC100166526	1817.99	-4.4995	22.6195	1.58951e-17	8.72475e-17
LOC100572039	7.54006	-4.49737	22.5863	1.65237e-06	4.01712e-06
LOC100571674	1237.31	-4.4969	22.5788	1.86941e-23	1.46604e-22
LOC100161203	299.739	-4.49684	22.578	1.0033e-13	4.24898e-13
LOC100166522	32.4638	-4.49643	22.5715	1.12008e-08	3.2851e-08
LOC100570824	2.67923	-4.49608	22.5661	0.00177144	0.00317
LOC100168655	371.314	-4.49568	22.5598	0.00148627	0.00268037
LOC100167837	587.515	-4.49017	22.4737	2.47798e-62	9.55668e-61
LOC100569694	9199.38	-4.48933	22.4607	1.08799e-24	9.23805e-24
LOC100574765	9.91069	-4.48795	22.4392	2.91525e-07	7.58326e-07
LOC100163195	490.692	-4.48716	22.4268	9.01116e-33	1.16205e-31
LOC100165032	695.888	-4.4865	22.4167	8.89683e-25	7.60117e-24
LOC100573905	66.7869	-4.48404	22.3784	2.19288e-14	9.73862e-14
LOC100165275	1354.4	-4.4837	22.3732	1.4939e-23	1.17917e-22
Cpap3-d2	8289.89	-4.48292	22.3611	1.71708e-23	1.34966e-22
LOC100572476	55.5432	-4.4827	22.3576	1.09661e-07	2.95949e-07
n-syb	895.744	-4.48269	22.3575	1.38319e-27	1.38743e-26
LOC100158946	1245.83	-4.48041	22.3223	8.60024e-15	3.92586e-14
LOC100168206	120.759	-4.48002	22.3162	7.95011e-27	7.59068e-26
LOC100571068	2.63643	-4.47807	22.286	3.80133e-05	8.13198e-05
LOC100572933	2.63612	-4.47534	22.2439	0.00342777	0.005912
LOC100160004	191.175	-4.47513	22.2407	2.7294e-08	7.73461e-08
LOC100571631	1497.52	-4.47269	22.2031	2.34842e-22	1.72622e-21
LOC100164006	1623.11	-4.47238	22.1983	7.55206e-62	2.88559e-60
LOC100164009	1050.69	-4.47075	22.1733	7.65847e-17	4.04343e-16
LOC100159485	248.929	-4.47032	22.1667	4.63005e-22	3.32864e-21
LOC100164577	4216.04	-4.46847	22.1383	1.23514e-49	3.27567e-48
cprr1-1	41871.8	-4.46616	22.1028	1.36433e-53	4.09161e-52
LOC100572423	280.392	-4.46509	22.0864	4.17977e-40	7.43458e-39
Catb-2744	2818.21	-4.45998	22.0084	1.30544e-22	9.74849e-22
LOC100161159	2023.39	-4.45969	22.004	1.00495e-12	3.96541e-12
LOC103309122	2.60556	-4.45894	21.9925	1.06908e-05	2.41313e-05
LOC100571995	563.791	-4.45861	21.9875	1.06442e-16	5.56567e-16
LOC100168531	7.16491	-4.45766	21.973	1.54128e-06	3.75634e-06
LOC100574588	299.284	-4.45733	21.9679	2.47814e-54	7.59753e-53
LOC100166556	14.5085	-4.45728	21.9672	9.51688e-11	3.3002e-10
LOC100574542	2.60831	-4.45675	21.9591	0.0251576	0.0383393
LOC100168802	3997.55	-4.45655	21.956	1.99171e-52	5.75559e-51
LOC100165386	625.954	-4.4559	21.9461	1.49556e-11	5.47901e-11
LOC100302630	837.105	-4.45328	21.9064	3.91133e-22	2.83266e-21
LOC100570048	12.2065	-4.45305	21.903	1.52246e-07	4.05693e-07
LOC103309324	2.59592	-4.45032	21.8616	0.0262134	0.039816
LOC100574730	55.8547	-4.44605	21.7968	2.26017e-08	6.44538e-08
LOC100162944	1675.53	-4.44301	21.751	3.56146e-27	3.48594e-26
LOC103308445	2.5798	-4.4426	21.7448	0.0268455	0.0407222
LOC100576063	32.0401	-4.44233	21.7407	0.000188008	0.000375125
LOC100169487	1004	-4.44179	21.7327	2.3611e-15	1.12095e-14
LOC100161636	385.108	-4.44127	21.7247	8.32945e-13	3.30715e-12
LOC100569670	2.57498	-4.44049	21.7131	0.00242999	0.0042842
LOC100164849	152.913	-4.43982	21.703	5.13011e-14	2.21535e-13
LOC100167683	725.087	-4.43787	21.6737	1.94386e-25	1.71254e-24
LOC100168170	566.408	-4.43679	21.6574	4.94834e-07	1.25831e-06
Cpap3-c	23037.3	-4.43598	21.6453	1.3777e-58	4.8426e-57
LOC100573440	2640.64	-4.43501	21.6308	9.3475e-37	1.42337e-35
LOC100573403	2.5704	-4.43339	21.6065	0.0036004	0.0061911
LOC100167942	657.578	-4.43126	21.5745	1.03833e-06	2.57095e-06
LOC100575458	403.8	-4.42879	21.5376	3.37397e-16	1.70961e-15
LOC103309133	2.55236	-4.42576	21.4925	0.0003948	0.000760872
LOC100158875	195.906	-4.42542	21.4874	2.5485e-15	1.20714e-14
LOC100572901	76.1214	-4.42538	21.4868	0.00100994	0.00186005
LOC100574483	3927.98	-4.42531	21.4857	6.90228e-22	4.92614e-21
LOC100163274	6370.25	-4.42463	21.4757	1.31968e-22	9.84064e-22
LOC100163746	2.5483	-4.42445	21.4729	0.0315126	0.0473045
LOC100164176	1094.67	-4.42317	21.4539	4.38816e-14	1.90452e-13
LOC100163512	71.6915	-4.42271	21.4472	3.2316e-21	2.20933e-20
LOC100168054	47.8217	-4.4211	21.4232	3.29847e-06	7.8128e-06
LOC100159750	2503.44	-4.42008	21.4081	1.64942e-21	1.15052e-20
LOC100573322	26.1941	-4.41616	21.3499	6.47925e-07	1.63052e-06
LOC100168953	88.4938	-4.41402	21.3183	1.12311e-15	5.4718e-15
LOC103308880	2.51921	-4.41359	21.312	1.67136e-05	3.70969e-05
LOC100167149	168.074	-4.41173	21.2845	2.46515e-61	9.33274e-60
Enpep	331.81	-4.41171	21.2842	0.000119711	0.000243614
LOC100575704	100.078	-4.41122	21.277	1.65604e-08	4.78155e-08
LOC100568923	2555.5	-4.41113	21.2756	2.61425e-21	1.80039e-20
LOC103309970	130.776	-4.40841	21.2355	2.49779e-11	9.00836e-11
LOC100159700	5789.74	-4.40647	21.2071	8.23849e-11	2.86991e-10
LOC100163566	10933.1	-4.40508	21.1866	2.99607e-23	2.32573e-22
LOC100168347	149.617	-4.40356	21.1644	1.14815e-43	2.38088e-42
LOC100159286	866.206	-4.402	21.1415	2.63617e-38	4.30998e-37
LOC100573847	2.51582	-4.40119	21.1296	0.00303656	0.00528007
LOC100168377	1772.9	-4.40076	21.1233	4.37215e-41	8.10517e-40
LOC100159898	252.811	-4.40019	21.1149	0.000114076	0.000232628
LOC100161874	1421.23	-4.39939	21.1032	4.32703e-50	1.16098e-48
LOC100569063	853.084	-4.39835	21.088	1.61502e-09	5.06654e-09
ACYPI56502	1948.26	-4.39561	21.0479	7.56647e-17	3.99588e-16
LOC100572916	41.6735	-4.39461	21.0334	2.82709e-17	1.53262e-16
ACYPI39568	23000.3	-4.39016	20.9686	1.44271e-18	8.42078e-18
LOC100164134	198.719	-4.3868	20.9199	5.3211e-58	1.83596e-56
LOC100572006	12.6364	-4.38548	20.9007	6.76868e-06	1.55921e-05
LOC100169015	250.007	-4.38473	20.8898	8.43195e-34	1.14233e-32
LOC103311519	2.47608	-4.38452	20.8868	6.01821e-05	0.000126014
LOC100160509	374.268	-4.3796	20.8157	6.34635e-08	1.74499e-07
LOC100165811	1308.29	-4.37904	20.8076	1.28915e-103	1.19815e-101
LOC103311453	2.47434	-4.37849	20.7997	0.02961	0.04464
LOC103309555	6.96402	-4.3756	20.7581	1.48932e-05	3.31991e-05
LOC100576036	404.193	-4.37512	20.7512	1.65408e-06	4.0208e-06
LOC100568898	15.8353	-4.37453	20.7427	5.55974e-12	2.09218e-11
LOC100159387	1344.1	-4.37388	20.7333	1.18101e-57	4.03441e-56
LOC100572343	211.58	-4.37384	20.7327	5.17945e-19	3.11204e-18
LOC100574242	199.117	-4.37205	20.7071	6.30604e-15	2.90365e-14
LOC100571939	50.7675	-4.36715	20.6369	2.69642e-05	5.86312e-05
LOC100166818	572.749	-4.36409	20.5931	3.16879e-53	9.43458e-52
LOC103310843	762.784	-4.36293	20.5765	3.19791e-65	1.33029e-63
LOC103309625	929.88	-4.36167	20.5586	4.7983e-14	2.07467e-13
LOC100572049	6.65902	-4.36134	20.5539	1.96806e-05	4.34067e-05
LOC100571085	44.3541	-4.36093	20.548	7.71554e-10	2.48742e-09
LOC100162717	814.038	-4.35918	20.5231	3.45699e-13	1.4116e-12
LOC100167165	5518.26	-4.35911	20.5221	2.93352e-46	6.81615e-45
LOC100166850	911.524	-4.35722	20.4953	1.67558e-13	6.96598e-13
LOC100166321	85.9864	-4.35582	20.4754	4.35568e-12	1.65173e-11
LOC100568839	15.9507	-4.35553	20.4713	6.71157e-07	1.68754e-06
LOC100160356	6309.29	-4.35521	20.4667	9.59962e-05	0.000197123
LOC100164607	653.886	-4.35312	20.4371	1.176e-08	3.44029e-08
LOC100167863	12288.7	-4.34913	20.3807	4.95945e-28	5.09096e-27
NV22	50.7625	-4.34503	20.3228	9.57921e-25	8.15043e-24
LOC100569335	354.813	-4.34262	20.289	8.98557e-14	3.81558e-13
LOC100165601	2.42072	-4.34238	20.2855	0.000806961	0.00150325
LOC100570518	128.812	-4.34109	20.2674	7.2661e-09	2.16806e-08
LOC103310385	2.41237	-4.34022	20.2552	0.000162263	0.000325931
LOC100161679	3121.88	-4.33986	20.2501	0.000169259	0.000339423
LOC103307618	13.3667	-4.33871	20.234	6.91529e-08	1.89562e-07
LOC100573635	2.40365	-4.33705	20.2107	0.00197467	0.00351812
LOC100160644	1208.1	-4.33661	20.2045	3.78443e-12	1.44173e-11
LOC100575288	179.499	-4.33302	20.1544	2.40347e-26	2.23081e-25
LOC100165932	85.0682	-4.33249	20.1469	1.62949e-11	5.95912e-11
LOC100570600	42.6928	-4.33138	20.1314	1.48348e-10	5.07776e-10
LOC100168442	461.597	-4.3286	20.0927	2.17862e-48	5.47522e-47
LOC100573990	322.128	-4.32777	20.0811	1.06329e-102	9.62233e-101
LOC103309601	157.284	-4.32603	20.057	8.23875e-07	2.0577e-06
LOC100569686	6.49361	-4.32526	20.0463	1.65372e-05	3.67132e-05
LOC100163976	492.773	-4.32337	20.02	8.49445e-13	3.36791e-12
LOC100574652	51.3513	-4.32293	20.0139	1.08827e-06	2.6901e-06
LOC100569577	10.7578	-4.31843	19.9516	0.00412631	0.00704319
LOC100575638	15.436	-4.31805	19.9463	3.77236e-10	1.24656e-09
LOC100569259	13.4618	-4.31654	19.9254	1.4363e-08	4.16691e-08
LOC103308749	403.021	-4.31617	19.9204	2.52813e-61	9.55363e-60
LOC100169318	1981.26	-4.31607	19.9189	3.02775e-111	3.22018e-109
LOC100573358	2.35821	-4.31443	19.8963	0.00519882	0.00875151
Obp5	7423.39	-4.31418	19.8929	4.23318e-31	5.01396e-30
LOC100575209	4.79593	-4.31255	19.8705	0.000125592	0.000255029
LOC100162264	321.441	-4.30839	19.8132	1.65621e-31	2.00779e-30
LOC103309254	6.7326	-4.30781	19.8052	8.56916e-07	2.13639e-06
LOC100570068	400.482	-4.30274	19.7358	4.156e-68	1.84808e-66
LOC100575323	810.804	-4.30219	19.7282	3.13774e-58	1.0936e-56
ACYPI45001	6908.09	-4.29748	19.6639	2.28846e-18	1.32337e-17
LOC100161483	2.32909	-4.2928	19.6002	0.00511081	0.00861179
LOC100167919	815.31	-4.29232	19.5937	0.000114516	0.000233479
LOC100575264	2.32382	-4.29196	19.5889	0.00439089	0.00746393
LOC103311775	8.64365	-4.29159	19.5838	3.67032e-06	8.66473e-06
LOC100166538	4.68065	-4.28886	19.5468	1.12786e-05	2.54024e-05
LOC100162737	2.31698	-4.28855	19.5425	0.00579308	0.00968078
LOC100164109	2716.68	-4.28252	19.461	4.59685e-13	1.85829e-12
LOC100163730	569.463	-4.28077	19.4375	1.56495e-17	8.59451e-17
LOC100166703	266.356	-4.27964	19.4223	1.19656e-56	3.95019e-55
LOC100158860	2.30136	-4.27736	19.3916	0.0321395	0.0481755
LOC100570896	4.71452	-4.27689	19.3853	0.00257241	0.00451869
cp10	4892.45	-4.27599	19.3733	3.19448e-15	1.50483e-14
LOC100164135	23.93	-4.27479	19.3571	5.87431e-07	1.48353e-06
LOC100169350	506.787	-4.27138	19.3114	6.15776e-11	2.16077e-10
LOC100574449	8.3803	-4.2705	19.2996	1.20092e-07	3.22721e-07
LOC100163139	360.361	-4.2676	19.2608	6.58713e-16	3.26007e-15
LOC100159471	495.992	-4.26751	19.2596	0.000338916	0.000657285
LOC103308739	2.2872	-4.26533	19.2306	0.00536597	0.00901009
LOC100159937	522.676	-4.26496	19.2257	1.00989e-23	8.07008e-23
LOC103309481	2.27121	-4.26263	19.1946	0.00300887	0.00523501
LOC100164287	4919.81	-4.26186	19.1844	1.07607e-11	3.97611e-11
LOC103309052	2.26288	-4.25875	19.1431	0.000141043	0.000285111
NV10	8143.99	-4.25866	19.1419	1.4455e-23	1.1414e-22
LOC103311634	2.27211	-4.2567	19.1158	0.000486519	0.00092793
LOC100165947	56.4753	-4.25302	19.0671	2.53103e-07	6.61886e-07
LOC100163287	32.6568	-4.25131	19.0446	1.02126e-05	2.31125e-05
LOC103308745	13.6326	-4.25074	19.037	0.00466161	0.00789096
LOC100164788	2147.66	-4.24142	18.9144	1.78865e-113	2.07332e-111
LOC100572028	109.163	-4.24062	18.904	3.694e-18	2.11894e-17
LOC103311948	2.24038	-4.23958	18.8904	0.0177122	0.0276945
LOC100572110	71.5478	-4.23489	18.8291	9.10983e-16	4.46362e-15
LOC100165591	6.47384	-4.23146	18.7843	3.38478e-05	7.28164e-05
LOC100165954	593.779	-4.2292	18.755	2.12365e-95	1.64727e-93
LOC100162751	58.2889	-4.22777	18.7364	3.50015e-07	9.03184e-07
LOC100163585	2051.2	-4.22635	18.718	3.30488e-28	3.42833e-27
LOC103310157	15.2064	-4.22515	18.7024	1.52695e-06	3.72273e-06
LOC100574622	2.23327	-4.22503	18.7008	4.13182e-05	8.80337e-05
LOC100168007	8.77442	-4.22343	18.6801	0.000554148	0.00104993
LOC100166919	2.21008	-4.22279	18.6718	0.000224386	0.000443463
LOC100160554	322.252	-4.22194	18.6608	6.53579e-09	1.95723e-08
LOC100572277	6.28409	-4.22122	18.6514	3.54855e-05	7.61174e-05
LOC100574732	2.21722	-4.22057	18.6431	0.00293111	0.00510747
LOC100162247	2.21637	-4.21742	18.6024	5.22571e-05	0.000110169
LOC103311522	14.6533	-4.21359	18.5531	1.05735e-07	2.85554e-07
LOC100167948	5594.42	-4.21351	18.5521	4.48967e-09	1.36229e-08
LOC100167341	27.3282	-4.21322	18.5483	1.38907e-06	3.39703e-06
LOC100166209	500.434	-4.21249	18.5389	1.34156e-30	1.54812e-29
LOC100160247	276.065	-4.20982	18.5047	9.81495e-39	1.63448e-37
[truncated: 2,213 more rows]
